# 1 **Large structural variations in the haplotype-resolved African cassava genome.**

2 <sup>1</sup>Ben N. Mansfeld: 0000-0001-6118-6409

3 <sup>1</sup>Adam Boyher: 0000-0001-9681-1817

4 <sup>1</sup>Jeffrey C. Berry: 0000-0002-8064-9787

5 <sup>1</sup>Mark Wilson:

6 <sup>2</sup>Shujun Ou: 0000-0001-5938-7180

7 <sup>1</sup>Seth Polydore: 0000-0002-7779-7367

8 <sup>3</sup>Todd P. Michael: 0000-0001-6272-2875

9 <sup>1</sup>Noah Fahlgren: 0000-0002-5597-4537

10 <sup>1,4</sup>Rebecca S. Bart: 0000-0003-1378-3481

11 <sup>1</sup> Donald Danforth Plant Science Center, St. Louis MO, USA 63132.

12 <sup>2</sup> Department of Ecology, Evolution, and Organismal Biology, Iowa State University, Ames, IA 50011

13 <sup>3</sup> The Molecular and Cellular Biology Laboratory, The Salk Institute for Biological Studies, La Jolla, CA  
14 92037, USA

15 <sup>4</sup> Corresponding author: [rbart@danforthcenter.org](mailto:rbart@danforthcenter.org)

## 16 **Abstract**

17 Cassava (*Manihot esculenta* Crantz, 2n=36) is a global food security crop. Cassava has a highly  
18 heterozygous genome, high genetic load, and genotype-dependent asynchronous flowering. It is typically  
19 propagated by stem cuttings and any genetic variation between haplotypes, including large structural  
20 variations, is preserved by such clonal propagation. Traditional genome assembly approaches generate a  
21 collapsed haplotype representation of the genome. In highly heterozygous plants, this results in artifacts  
22 and an oversimplification of heterozygous regions. We used a combination of Pacific Biosciences  
23 (PacBio), Illumina, and Hi-C to resolve each haplotype of the genome of a farmer-preferred cassava line,  
24 TME7 (Oko-iyawo). PacBio reads were assembled using the FALCON suite. Phase switch errors were  
25 corrected using FALCON-Phase and Hi-C read data. The ultra-long-range information from Hi-C  
26 sequencing was also used for scaffolding. Comparison of the two phases revealed more than 5,000 large  
27 haplotype-specific structural variants affecting over 8 Mb, including insertions and deletions spanning

28 thousands of base pairs. The potential of these variants to affect allele specific expression was further  
29 explored. RNA-seq data from 11 different tissue types were mapped against the scaffolded haploid  
30 assembly and gene expression data are incorporated into our existing easy-to-use web-based interface to  
31 facilitate use by the broader plant science community. These two assemblies provide an excellent means  
32 to study the effects of heterozygosity, haplotype-specific structural variation, gene hemizyosity, and  
33 allele specific gene expression contributing to important agricultural traits and further our understanding  
34 of the genetics and domestication of cassava.

### 35 **Keywords**

36 Cassava, Genome assembly, High heterozygosity, Haplotype phasing, Structural variants

### 37 **Significance statement**

38 The cassava varieties grown by subsistence farmers in Africa largely differ from the inbred reference  
39 genome due to their highly heterozygous nature. We used multiple sequencing technologies to assemble  
40 and resolve both haplotypes in TME7, a farmer-preferred cassava line, enabling us to study the  
41 considerable haplotypic structural variation in this line.

### 42 **Introduction**

43 Cassava (*Manihot esculenta* Crantz  $2n=2x=36$ ) is a globally important crop and is particularly  
44 critical for subsistence farmers in the developing world (Ceballos *et al.*, 2004). As an outcrossing plant,  
45 cassava is considerably heterozygous with a high genetic load and, thus suffers from inbreeding  
46 depression (Rojas *et al.*, 2009). This has hindered genetic improvement via breeding in cassava, and many  
47 agriculturally favorable lines are commonly clonally propagated, which maintains any heterozygosity in  
48 the germplasm (Aye, 2011; Ramu *et al.*, 2017). Moreover, the heterozygous nature of the cassava genome  
49 and limitations in sequencing technologies have limited the ability to accurately sequence and assemble  
50 the genome (Chin *et al.*, 2016). Due to this, a partially inbred cassava accession, AM560-2, was selected  
51 as the cassava reference genome (Prochnik *et al.*, 2012). AM560-2 is the product of three generations of  
52 selfing of the Colombian cassava line MCol1505, and is 94% homozygous (Bredeson *et al.*, 2016). The  
53 reference genome has been an asset to the cassava community for more than 10 years, but due to the  
54 homozygous nature of the genome it does not accurately represent lines grown in farmer's fields.

55 The development of long-read and long-range sequencing technologies and recent advancement  
56 in assembly algorithms have strong implications for genome assembly of heterozygous plant and animal  
57 species. Such haplotype-resolved genome assemblies can be crucial to our comprehension of genetics in

58 crops with strong inbreeding depression where generation of inbred lines is very difficult and not  
59 representative of the agriculturally grown plants. However even with these advances, assembling fully  
60 haplotype-phased genomes is difficult, especially when rates of heterozygosity are high (Michael and  
61 VanBuren, 2020). New genome assembly strategies now exist for separate assembly of homologous and  
62 homeologous chromosome copies, allowing for accurate phasing of haplotypes and polyploid genomes  
63 (Chin *et al.*, 2016; Koren *et al.*, 2018; Kronenberg *et al.*, 2018). One such strategy uses sequence data  
64 from parental lines to discern the haplotype-specificity of offspring sequence reads prior to their assembly  
65 (Koren *et al.*, 2018). However, this strategy requires access to the parental genotypes, which are unknown  
66 in many clonally propagated farmer-preferred cassava lines. Another novel approach utilizes single cell  
67 sequencing of gamete cells to gain insight into phasing information and haplotype assembly (Campoy *et al.*,  
68 2020). This “Gamete binning” approach was showcased in the heterozygous tree crop apricot (*Prunus*  
69 *armeniaca*), and while potentially a viable option for field grown cassava lines, it requires extraction of  
70 pollen nuclei and other technical skills that are potentially limiting factors to its immediate adoption  
71 (Campoy *et al.*, 2020). An alternate computational approach, implemented in the FALCON-Phase  
72 algorithm, uses mapping information from long-range chromatin conformation capture (Hi-C) sequencing  
73 to correctly phase haplotype assembled sequences (Kronenberg *et al.*, 2018). This *de novo* approach can  
74 be used to correct assembly phase switch errors, and accurately represent the chromosome from telomere  
75 to telomere (Kronenberg *et al.*, 2018).

76         Recent attempts at assembling heterozygous farmer-preferred cassava lines have produced  
77 contiguous large assemblies (Kuon *et al.*, 2019). These assemblies however are limited due to the lack of  
78 haplotypic separation; the primary assemblies include both haplotypes and thus contain many duplicated  
79 sequences (Kuon *et al.*, 2019; Lyons *et al.*, 2021). This has implications on the assembly size and  
80 scaffolding which can be severely impacted by these duplications (Guan *et al.*, 2020). Sequence  
81 duplication can also cause problems for downstream analyses such as read mapping and gene annotation.  
82 Assessing the deduplication, completeness, and quality of heterozygous genomes thus plays a critical role  
83 in each assembly step, to ensure truly resolved haplotypic sequences (Rhie *et al.*, 2020).

84         Here, we assemble a phased diploid assembly of the Nigerian cassava landrace (Tropical-  
85 Manihot-esculenta) TME7, also known as "Okoyawo", a farmer-preferred line resistant to the cassava  
86 mosaic disease virus (Rabbi *et al.*, 2014). By assembling and phasing the moderately sized (~700 Mb)  
87 diploid cassava genome we have a unique opportunity to study haplotype-specific structural  
88 polymorphisms maintained for generations by clonal propagation. Elucidation of haplotype-specific  
89 structural variations in cassava will have direct implications for our understanding of these types of  
90 variations in other clonally propagated, heterozygous crops with larger genomes, including many tree

91 fruit crops and other horticulturally important species. The two haplotype assemblies will also provide an  
92 excellent means to study the haplotype-specific structural variation, synteny, and allele-specific gene  
93 expression that contribute to important agricultural traits, furthering our understanding of the genetics and  
94 domestication of cassava. As breeding is difficult in a crop such as cassava, a better understanding of the  
95 haplotype-specific genetics will allow for more accurate, appropriate, and targeted gene editing to  
96 improve lines for agricultural purposes.

## 97 **Results and discussion**

### 98 **Genome size and heterozygosity**

99 Due to the significant differences between TME7 (a clonally propagated, heterozygous, farmer-  
100 preferred line grown in Africa) and AM560-2 (an inbred South American line) we opted to re-estimate the  
101 genome size of TME7 prior to assembly. Both flow cytometry and a k-mer based approach  
102 [GenomeScope (Vurture *et al.*, 2017)], estimated the genome size to be within the range of 670-711 Mb  
103 (Figure 1). We settled on ~700 Mb as a target haploid size for this assembly. This estimate is moderately  
104 lower than that estimated for the reference genome line AM560-2 (~750Mb, Bredeson *et al.*, 2016 ).  
105 Based on the k-mer analysis, the repeat content was estimated at roughly 61% of the estimated genome  
106 size and the two very distinct k-mer frequency peaks suggested a high level of heterozygosity (Figure 1B,  
107 Supplementary Figure 1). The GenomeScope model further estimated the heterozygosity of this cassava  
108 line to be ~1.4%, or roughly one polymorphism every ~70 bp (Figure 1B). This is slightly lower than  
109 other outcrossing clonally propagated crops such as pear (1.6%, Vurture *et al.*, 2017), grape (1.6-1.7%,  
110 (Patel *et al.*, 2018; Guan *et al.*, 2020), as well as the closely related rubber tree (1.6%, Shi *et al.*, 2019).  
111 Nonetheless, this level of estimated heterozygosity suggested that haplotype-resolved assembly  
112 approaches would be appropriate for assembly of the cassava genome.

### 113 **Maximizing the diploid assembly**

114 With that goal in mind, we sequenced the TME7 cassava genome using PacBio single-molecule  
115 long-read sequencing (SMRT) sequencing cells yielding roughly 90x coverage. We generated 64.2 Gb of  
116 data in 8,018,064 raw PacBio subreads (Supplementary Figure 2) that had an N50 of 11,099 bp;  
117 4,970,318 of the reads were longer than 5,000 bp, which was used as a seed read size. We generated a  
118 PacBio-only assembly with FALCON and FALCON-Unzip (Chin *et al.*, 2016). FALCON-Unzip  
119 assembled a total of 874 Mb in primary contigs, as well as an additional 157 Mb in haplotigs. FALCON-  
120 Unzip is limited in its ability to identify sequences with greater than 4-5% variation as haplotypic

121 sequences, and these are often retained as primary contigs (Chin *et al.*, 2016, also eg. Padgitt-Cobb *et al.*,  
122 2019). The total sequence assembled was ~1 Gb, and while not yet well partitioned into haplotypes,  
123 included about 300 Mb in potentially haplotypic sequences. This represented the potential for an  
124 approximately 50% “unzipped” genome assembly. Assembly statistics for each stage of assembly and  
125 phasing are reported in Table 1.

126 To estimate the success of haplotypic separation and assembly quality we performed k-mer based  
127 analyses using Merqury (Rhie *et al.*, 2020). Using raw, highly accurate short read sequencing representing  
128 data from both haploid sequences, k-mers which exist in 1- or 2-copies arise from heterozygous and  
129 homozygous regions, respectively. The k-mer distributions are then represented by the number of times  
130 each k-mer appears in the assembly allowing for the comparison of observed and expected coverage,  
131 estimation of reference-free completeness, and overall phasing success.

132 We first observed that even after polishing INDELS with pilon (Walker *et al.*, 2014), a peak of  
133 heterozygous (1-copy) k-mers are missing from either the primary or alternate assemblies (Supplementary  
134 Figure 3). As our goal was to assemble a full heterozygous diploid phased assembly, we sought to  
135 maximize the amount of haplotypic sequence assembled. To this end we supplemented the long-read  
136 assembly with short read contigs containing additional heterozygous sequence. We identified k-mers that  
137 contained the short-reads pertaining to the missing heterozygous sequence and assembled them using  
138 SPAdes. (Bankevich *et al.*, 2012). Some of these extra short read contigs (SRC) contained duplicates of  
139 already assembled sequences, but importantly many included the missing heterozygous sequence. Adding  
140 these SRCs to the full assembly brought the total assembled sequence to 1.15 Gb, or nearly the  
141 anticipated diploid size of ~1.4 Gb. The number of missing k-mers was brought down from 23.7 M to 9.9  
142 M using this approach and the “Completeness” score was brought up to 96.2% when including the SRCs  
143 (Table 1). Based on the missing k-mers, after adding the SRC an estimated 9.8 Mb of missing  
144 heterozygous sequence remained un-assembled.

145 **Table 1: Assembly contiguity, completeness, and quality assessment**

|                   | <i>Falcon</i> |           | <i>Falcon-Unzip</i> |           | <i>Pilon</i> |           | <i>Add SRC</i> | <i>purge_dups</i> |           | <i>FALCON-Phase Unzip</i> |           | <i>FALCON-Phase Pseudohaplotype</i> |           | <i>Scaffolding</i> |
|-------------------|---------------|-----------|---------------------|-----------|--------------|-----------|----------------|-------------------|-----------|---------------------------|-----------|-------------------------------------|-----------|--------------------|
|                   | Primary       | Alternate | Primary             | Alternate | Primary      | Alternate | Diploid        | Primary           | Alternate | Primary                   | Alternate | Primary                             | Alternate | Primary            |
| No. contigs       | 6,910         | 917       | 5,114               | 5,254     | 5,114        | 5,254     | 75,291         | 9,925             | 17,415    | 9,925                     | 12,805    | 9,925                               | 9,925     | 4936               |
| Total length (Mb) | 901           | 50.3      | 874                 | 157       | 875          | 157       | 115            | 677               | 341       | 702                       | 313       | 720                                 | 720       | 720                |
| N50 (Kb)          | 253.3         | 76.1      | 263.3               | 51.6      | 263.4        | 51.6      | 192.4          | 283.1             | 83.0      | 305.2                     | 80.3      | 318.9                               | 322.7     | 31.2 Mb            |
| Completeness      | 83.3          | 10.2      | 86.1                | 28.6      | 87.5         | 29.0      | -              | 81.2              | 56.5      | 82.0                      | 54.2      | 82.8                                | 82.8      | 82.8               |
| both              | 84.6          |           | 90.05               |           | 91.5         |           | 96.2           | 93.9              |           | 93.65                     |           | 93.66                               |           |                    |
| QV                | 27.5          | 28.5      | 29.7                | 29.5      | 33.3         | 32.7      | -              | 34.3              | 33.5      | 34.1                      | 34.4      | 34.0                                | 34.0      | 34.0               |
| both              | 27.56         |           | 29.68               |           | 33.18        |           | 33.66          | 34.03             |           | 34.2                      |           | 34.0                                |           |                    |

SRC - Short read contigs

146

## 147 **Haplotypic purging and deduplication.**

148 To complement the graph-based assembly approach used in FALCON-Unzip (Chin *et al.*, 2016),  
149 other, orthogonal tools have since been developed to extract haplotypic sequences from primary  
150 assemblies (eg. Huang *et al.*, 2017; Roach *et al.*, 2018; Guan *et al.*, 2020). These typically use read  
151 mapping coverage and sequence homology to identify potential haplotigs and “purge” them from the  
152 primary assembly (Roach *et al.*, 2018). After maximizing our diploid assembly size to include as much  
153 haplotypic sequence as possible, our goal was to purge the primary assembly of haplotypic contigs,  
154 overlaps and sequence duplication, including those from our SRCs (Figure 2, Supplementary Figure 3).  
155 To this end we used `purge_dups` (Guan *et al.*, 2020) which improves on the previous state-of-the-art,  
156 `purge_haplotigs` (Roach *et al.*, 2018), by identifying and purging haplotypic overlaps. The final set of  
157 primary contigs included approximately 677 Mb assembled in 9925 contigs with an N50 of 283.1 kb. The  
158 resulting alternate assembly contained over 341 Mb assembled in haplotigs, representing a ~50%  
159 “unzipped” genome.

160 K-mer spectra plots showed that the amount of sequence duplication was drastically reduced after  
161 purging, and that most of the heterozygous (1-copy) k-mers were now successfully separated into the two  
162 assemblies (Figure 2, Supplementary Figure 3). This was further confirmed by alignment of markers from  
163 the cassava 20k linkage map (ICGMC, 2015) (Figure 3B) and deduplication of BUSCO genes (Figure 4).  
164 After purging, the haplotig N50 size, which corresponds to the haplotype phase block, was 83 kb (90.5 kb  
165 if excluding SRC derived haplotigs). This is substantively smaller than the 7 Mb block described in the  
166 Arabidopsis F<sub>1</sub> assembly by Chen and colleagues (2016), but is more similar to that observed in  
167 Carménère grape (89.5 Kb, Minio *et al.*, 2019). Furthermore, it is consistent with relatively short  
168 dispersed regions of heterozygosity, and with the high rate of linkage disequilibrium decay described in  
169 cassava, an obligate out crosser (Ramu *et al.*, 2017).

## 170 **Haplotype phasing and scaffolding with Hi-C sequencing**

171 To get a more accurate representation of the TME7 pseudo-haplotypes, we phased the primary  
172 and haplotig assemblies using Hi-C data and FALCON-Phase (Kronenberg *et al.*, 2018). We noticed  
173 however that during the placement and mincing stages of the algorithm, FALCON-Phase was discarding  
174 over 40 Mb of sequence from both primary and haplotig assemblies. We compared the haplotig truncation  
175 lengths with the contig vs. haplotig alignment lengths and identified that the FALCON-Phase  
176 `coords2hp.py` script truncated both contigs and haplotigs at the ends of alignments. We hypothesized that  
177 if large structural variations exist between haplotypes, this could affect how FALCON-Phase aligns and



178 places haplotigs vs. their primary contigs. Due to these large structural variations between the haplotypes,  
179 haplotig sequences were truncated to exclude the non-aligning sequences. Merqury analysis showed that  
180 removal of these sequences reduced the number of heterozygous k-mers in the assembly (Supplementary  
181 Figure 4). We thus modified the *coords2hp.py* script in FALCON-Phase to force it to include the entire  
182 length of each haplotig, rather than only the length of the sequences that aligned.

183 The result was one complete set of 9,925 contigs comprising ~720 Mb for each phase which  
184 included almost all the original heterozygosity assembled. This suggests we were able to successfully  
185 assemble nearly the entirety of the TME7 genome (720 Mb haploid assembly vs. ~700 Mb estimated  
186 genome size) with a contig N50 of approximately 320 kb for both assemblies. When emitted in “unzip”  
187 format, the total primary and haplotig contig length was 702 (N50 = 305 kb) and 311 Mb (N50 = 80 kb),  
188 respectively. We assessed the success of the phasing step using Merqury (Figure 2). A modest increase in  
189 homozygous sequence duplication was observed after phasing, probably due to incorporation of  
190 homozygous contig boundaries into the primary assembly (Figure 2A). This minor sequence duplication  
191 in the “pseudohaplotype” assembly was also observed with the unmodified version of the *coords2hp.py*  
192 script suggesting it may be an inherent issue with the FALCON-Phase algorithm (Supplementary Figure  
193 4). While this additional minor duplication is a limitation with this phase correction approach, the benefits  
194 of accurate phasing outweigh this issue.

195 After phasing, the Hi-C data was further used to scaffold the assembly into 18 chromosome  
196 length scaffolds. Contigs designated as part of Phase0 were scaffolded using the Proximo algorithm  
197 (Phase Genomics) and manual scaffolding curation with Juicebox (Rao *et al.*, 2014; Durand *et al.*, 2016).  
198 This process resulted in placing ~80% of all sequence in a set of 18 chromosome-scale scaffolds  
199 containing 580 Mb of sequence (Figure 3A). We validated the scaffolding order and orientation by  
200 aligning 22,403 SNP markers from the cassava composite map (ICGMC, 2015) to both phases. After  
201 filtering for > 95% identity and >150 bp length, more than 19,000 markers aligned uniquely to both  
202 phases. We plotted the concordance between the new *de novo* assembly and the linkage map and  
203 observed high collinearity between the two (Figure 3B). Except for a few cases, there was high agreement  
204 between the physical and linkage maps (average Spearman’s correlation of 0.96). Approximately 1,900  
205 marker sequence tags had duplicate mapping sites on the same scaffold in both phases and were  
206 distributed along the chromosome scaffolds (Supplementary Figure 5). While this may suggest potential  
207 sequence duplication or retained heterozygosity, an alternate explanation for some of these duplications  
208 are genotype specific duplications in TME7 that differ from the inbred reference genome. This represents  
209 a significant improvement over the previous attempts at assembly of heterozygous African cassava lines



210 (Kuon *et al.*, 2019), where close to 30% of markers had multiple map hits, indicating a not well  
211 deduplicated assembly.

## 212 **Assessing the quality of the final assembly**

213 When compared to the raw diploid short read data, the final assemblies showed ~94%  
214 completeness and a phred scaled quality score (QV) of >33 (or greater than 99.9995% accurate) (Table  
215 1). More short-read polishing could be performed to increase accuracy; however, this might come at a  
216 cost of falsely correcting heterozygosity. While some heterozygous sequence is still missing from the  
217 assembly, the majority of 1-copy k-mers are uniquely assigned to one of the haploid assemblies and not  
218 shared between them (Figure 2C). These results show that we have accurately produced one full  
219 haplotype assembly of TME7 and a second alternate assembly that contains most of the haplotypic  
220 variation in this genotype.

221 We used BUSCO (Simão *et al.*, 2015) analysis to verify that we successfully resolved the TME7  
222 haplotypes (Figure 4). The primary (phase0-scaffolded) assembly had a complete BUSCO score of  
223 96.9%, marginally outperforming the AM560-2 v6.1 assembly (complete: 95.1%; duplicated: 5.1%)  
224 (Bredeson *et al.*, 2016). The majority of complete single BUSCOs (969) are assembled in both phases, yet  
225 another 374 are missing from the alternate assembly (Figure 4C). This could be because these BUSCOs  
226 are homozygous and thus assembled in the collapsed regions of assembly, and/or due to the missing  
227 heterozygosity. Importantly, our deduplicated, TME7 Phase0 assembly only contains 7.9% duplicated  
228 BUSCOs, which is comparable to that of AM560-2 and represents a significant improvement compared to  
229 ~15% and ~19% of the non-haplotype-purged assemblies described in Kuon *et al.* (2019). Interestingly,  
230 we identified haplotype-specific complete BUSCOs (Figure 4C), and together the full diploid assembly  
231 (Phase0 scaffolds + Phase1 pseudohaplotype contigs) has a complete BUSCO score of greater than that of  
232 each phase separately (complete: 98.2%; 80.7% duplicated). This indicates that some BUSCOs may exist  
233 in a hemizygous state in the TME7 genome, and that complementation between the phases preserves the  
234 existence of these potentially crucial single copy genes.

## 235 **Transposable elements and gene annotation**

### 236 *Transposable element and repeat annotation*

237 Assembling the repetitive portion of the cassava genome is challenging as it is predicted to  
238 contain about 60% repetitive sequence (Figure 1B, Supplementary Figure 1). We used the LTR Assembly  
239 Index (LAI) to assess the quality and contiguity of the repetitive sequence assembly (Ou *et al.*, 2018).

240 Overall, both haploid assemblies display reference-quality contiguity in the repetitive portions of the  
241 genome, with LAI values of 10.53 and 11.17 for the phase0 and phase1 assembly, respectively  
242 (Supplementary Figure 6A). Further, we found that the contiguity of the repetitive space in the assembly  
243 was much improved compared to the unplaced scaffolds (Supplementary Figure 6B). We annotated both  
244 structurally intact and fragmented transposable elements (TEs) in the full diploid assembly using EDTA  
245 (Ou *et al.*, 2019). As expected, 59% of the TME7 genome are repeats and transposable elements, which  
246 are dominated by LTR retrotransposons that contribute about 50.5% of the genome (Table 2,  
247 Supplementary Figure 7). Terminal inverted repeat (TIR) and Helitron DNA transposons contributed  
248 2.43% to the total genome size. There were only marginal differences in TE content between the phases.

249 **Table 2. Summary of transposable elements in the TME7 genome assembly.**

| Category          | Phase0 | Phase1 | Average |
|-------------------|--------|--------|---------|
| LTR/Copia         | 6.24%  | 6.25%  | 6.25%   |
| LTR/Gypsy         | 35.36% | 36.22% | 35.79%  |
| LTR/unknown       | 8.49%  | 8.46%  | 8.48%   |
| TIR/CACTA         | 0.64%  | 0.63%  | 0.64%   |
| TIR/Mutator       | 0.90%  | 0.88%  | 0.89%   |
| TIR/PIF_Harbinger | 0.13%  | 0.16%  | 0.15%   |
| TIR/Tc1_Mariner   | 0.01%  | 0.01%  | 0.01%   |
| TIR/hAT           | 0.77%  | 0.67%  | 0.72%   |
| LINE/unknown      | 0.44%  | 0.44%  | 0.44%   |
| DNA/Helitron      | 0.02%  | 0.03%  | 0.03%   |
| repeat/unknown    | 6.05%  | 5.45%  | 5.75%   |
| Total LTR         | 50.09% | 50.93% | 50.51%  |
| Total DNA TE      | 2.47%  | 2.38%  | 2.43%   |
| Total TE          | 59.06% | 59.19% | 59.13%  |

250

### 251 *Gene annotation and synteny with AM560-2*

252 Gene annotation was performed using the MAKER, AUGUSTUS, and SNAP pipelines including  
253 transcript evidence from RNA-seq from 11 tissue types (Wilson *et al.*, 2017). We annotated 33,653 and  
254 35,684 genes in phase0 and phase1 assemblies, respectively (Figure 5B). Over 70% of annotated genes  
255 had an Annotation Edit Distance (AED) of less than 0.25 suggesting most genes were supported by high  
256 evidence levels (Supplementary Figure 8). Comparison of our annotations to that of the AM560-2 ref6  
257 showed that gene synteny between the two cassava genomes was largely conserved, however several

258 macro-level rearrangements are identifiable (Figure 6). Furthermore, this comparison revealed a largely  
259 2:2 pattern of syntenic depth between the annotations (Supplementary Figure 9), consistent with the  
260 whole genome duplication described in cassava (Bredeson *et al.*, 2016). About 36% of cassava genes  
261 exist in one syntenic block reciprocally in either genome, suggesting that these genes may have lost their  
262 extra copy since the paleo-duplication. Based on our analysis, it thus appears that the percent of genes  
263 which have retained their duplicate status is closer to 60%, rather than ~36% as previously reported  
264 (Bredeson *et al.* 2016). The prior analysis used homologous genes identified in *Jatropha curcas* as the  
265 reference; this likely limited the total numbers of homologs in the analysis, leading to the underestimate  
266 of retained duplicated genes. Only 2% of AM560-2 genes were not shared in syntenic blocks in TME7  
267 suggesting they may be unannotated, lost, or translocated out of their block.

## 268 **Haplotype-specific sequence and structural variation**

### 269 *Comparison to the inbred AM560-2 reference*

270 The differences in origin, genome size, and levels of heterozygosity between TME7 and the  
271 reference line AM560-2, prompted us to further compare the assemblies. Comparison of the TME7  
272 phase0 assembly to the AM560-2 ref v6.1 assembly revealed 2,257,216 SNPs and 1,666,639 bases  
273 affected by small INDELS (<50 bp) that differed (Supplementary Figure 10). We further identified over  
274 10,000 large structural variants (50-10,000 bp) affecting more than 15.99 Mb of sequence (Figure 7A,  
275 Supplementary File 1). There is increasing evidence pointing to the importance of large genomic  
276 structural variants, and their contribution to phenotypic traits (Alonge *et al.*, 2020; Zhou *et al.*, 2019). We  
277 thus examined the potential effects of the large INDELS (>50 bp) on gene function by measuring the  
278 distance to the nearest genes (Figure 7B). Out of 4,354 large INDELS, 1,217 were predicted to be within  
279 gene models and another 882 within 2,000 bp upstream of genes, potentially affecting cis-regulatory  
280 elements.

281 To visually validate, and assess the heterozygosity state of several of the largest deletions (>4 kb  
282 in length), we aligned short-reads from TME7 to the AM560-2 genome. Both homozygous and  
283 heterozygous deletions were identified, and an example of each is in Figure 7C and Figure 7D,  
284 respectively. A homozygous deletion identified on Chromosome14, where paired-end reads map to either  
285 side of the 4.11 kb deletion and a sharp decline in read coverage is observed, overlaps with the 3'-end of  
286 RNA CLEAVAGE STIMULATION FACTOR (Manes.14G160800) (Figure 7C). A heterozygous  
287 deletion on Chromosome03, that has read coverage approximately half that of the surrounding area,  
288 overlaps the potential promoter region of Manes.03G086200, annotated to encode Ribosomal protein L6  
289 (Figure 7D). This further supports the importance of assembling both haplotypes and suggests that many

290 large haplotypic structural variants might be present with potential impact on gene expression or  
291 function.

### 292 *Large haplotypic structural variation in TME7*

293 Recently shown in grape (Zhou *et al.*, 2019) and tomato (Alonge *et al.*, 2020), large genomic  
294 structural variations may have substantive effects on important agricultural traits. For example, the white  
295 berries of Chardonnay grape could be a result of a large inversion and deletion, causing hemizyosity at  
296 the *MybA* locus (Zhou *et al.*, 2019). To further examine the within-genome, haplotypic variation in TME7  
297 we aligned the alternate assembly to the primary assembly. FALCON-Phase has two options for emitting  
298 phased assemblies. In “unzip” style, short haplotigs containing alternate sequences are emitted alongside  
299 the phased primary contigs (as in FALCON-Unzip). In contrast, in “psuedohap” mode, pseudo-haplotype  
300 contigs are generated by collapsing alternate sequence from the phased haplotigs with homozygous  
301 sequence from primary assembly. Thus, the pseudo-haplotype alternate assembly might contain  
302 artificially homozygous sequences that were missing from the original alternate assembly, originating  
303 from lack of assembly or true hemizyosity in the alternate assembly. We therefore used the “unzip”-  
304 emit-style haplotigs for comparison to the primary assembly and calculated the mean haplotype  
305 divergence to be 2.09% +/- 0.18%. We further identified 1,116,832 SNPs and 300,883 small INDELS  
306 (<50 bp) in non-repetitive regions, collectively representing more than 2.14 Mb of heterozygous sequence  
307 between the two assemblies (Figure 5A). This confirms the high rate of heterozygosity predicted using k-  
308 mer based approaches and suggests a well extracted set of haplotigs.

309 To directly compare the two independently assembled TME7 haplotypes, we aligned the phase1  
310 contigs to the scaffolded phase0 assembly and identified large structural variations (SV). Overall, we  
311 identified more than 5,000 variants 50-10,000 bp in size including large insertions, deletions, tandem  
312 duplications, and contractions as well as repeat expansions and contractions (Table 3, Figure 5B,  
313 Supplementary File 2). The total sequence space that was affected by these structural variants was greater  
314 than 8 Mb. Thus, this within-genotype, haplotypic structural variation amounts to greater than half of the  
315 between-genotype differences that TME7 has with the AM560-2 reference line. The Assemblytics  
316 pipeline can also identify variants greater than 10 kb, however the accuracy with which these are  
317 distinguished from translocations or assembly errors is limited (Nattestad and Schatz, 2016). Though we  
318 primarily focused on a more conservative approach to identify large SVs, potentially larger haplotypic  
319 SVs were identified using Assemblytics. Including SVs up to 50 kb in size in the analysis, yielded close  
320 to 16 Mb of sequence affected by SV (Supplementary Figure 11). While these larger SVs should be

321 considered with caution, we note that this is comparable to structural heterozygosity reported in other  
322 species such as wine-grape (Minio *et al.*, 2019).

323 **Table 3. Summary of haplotype-specific structural variants**

|                           | 50-500 bp<br>Count | 50-500 bp<br>Total bp | 500-10000 bp<br>Count | 500-10000 bp<br>Total bp | Total<br>Count | Total bp  |
|---------------------------|--------------------|-----------------------|-----------------------|--------------------------|----------------|-----------|
| <b>Insertions</b>         | 699                | 110,936               | 348                   | 791,434                  | 1,047          | 902,370   |
| <b>Deletions</b>          | 676                | 99,453                | 226                   | 663,975                  | 902            | 763,428   |
| <b>Repeat expansion</b>   | 649                | 139,116               | 938                   | 2,722,146                | 1,587          | 2,861,262 |
| <b>Repeat contraction</b> | 668                | 144,659               | 1,136                 | 3,486,466                | 1,804          | 3,631,125 |
| <b>Tandem expansion</b>   | 27                 | 5,575                 | 31                    | 125,712                  | 58             | 131,287   |
| <b>Tandem contraction</b> | 7                  | 819                   | 3                     | 5,070                    | 10             | 5,889     |
|                           |                    |                       |                       | <b>Total:</b>            | 5,408          | 8,295,361 |

324

325 **Effects of haplotypic structural variation on allele specific expression**

326 The identified haplotypic SVs are primarily distributed in the chromosome arms and thus are  
327 often in close proximity to genes (Figure 5B). For example, the 7,217 bp heterozygous deletion, upstream  
328 of *Manes.03G086200* (Figure 7C) is correctly phased in our assemblies, as it was detected as an insertion  
329 in the phase1 contigs by alignment of the phase1 contigs vs the phase0 scaffolds (Figure 7E). We posited  
330 that large haplotype-specific INDELs upstream of genes, such as this one, would impact their allele  
331 specific expression (ASE). We thus examined ASE patterns in cassava leaf RNA-seq data (Wilson *et al.*,  
332 2017) and observed that of the 14,346 genes expressed in this set, 4,459 showed significant ASE (FDR <  
333 0.05, Supplementary File 3). Such a large number of genes with ASE is congruent with the high  
334 heterozygosity of TME7 and may have important biological implications as it has been observed in other  
335 heterozygous/hybrid crops (Shao *et al.*, 2019; Zhang *et al.*, 2020). In hybrid rice for example, patterns of  
336 ASE of over 3,000 genes may contribute to the genetic basis of heterosis (Shao *et al.*, 2019).

337 While there could be multiple reasons for ASE of genes (Wood *et al.*, 2015; Castel *et al.*, 2015),  
338 large haplotypic INDELs in cis-regulatory regions, such as the one in Figure 7D, could cause expression  
339 of one allele to be severely repressed. We thus defined two categories of ASE genes: If greater than 90%  
340 of read counts supported one allele of a gene over the other, we categorized the gene as having “complete  
341 ASE.” Conversely, we defined genes as having “partial ASE” if significant ASE was observed, yet allele  
342 ratios were not as enriched in either direction. We observed that greater than 12% of genes with ASE  
343 show patterns of “complete ASE” (Figure 8A).

344 We then compared the distribution of distances to the nearest large INDEL between ASE and  
345 non-ASE genes. “Complete ASE” genes had significantly different distance distributions from both  
346 “partial ASE” and “no ASE” categories (K-S test,  $p < 0.05$ ). Genes with “partial ASE” did not have  
347 different distance distributions compared to those with no ASE. For all genes with an INDEL within 10  
348 kb upstream of the transcriptional start site, we further observed that the 26 genes identified in this set  
349 with “complete ASE” had different distance distributions, with an enrichment of INDELS around 5,000  
350 bp upstream with a median distance of 3,174 bp to the nearest INDEL, compared to 4,012 and 3,442 bp  
351 for “partial-” and no ASE, respectively (Figure 8B). While the genes themselves are not in a hemizygous  
352 state, the hemizyosity in their cis-regulatory regions might have important impacts on their allelic  
353 expression and potentially on downstream phenotypes. Though this is a narrow dataset of untreated leaf  
354 samples, examining the relationship between ASE and SVs in other datasets under additional treatments  
355 and/or conditions may further yield important cases where gene expression is affected by large haplotypic  
356 SVs (Knowles *et al.*, 2017).

357 Together, the single-nucleotide and large structural variants identified by comparing the two  
358 phased TME7 assemblies open a window into the complexity of the heterozygous cassava genome. Work  
359 in grapevine and their wild relatives suggests that SVs are primarily deleterious and that they are under  
360 strong purifying selection (Zhou *et al.*, 2019). Examining the conservation and diversity of large variants  
361 within a wide range of farmer-preferred cassava lines would shed light on the effect of SVs on cassava  
362 genome evolution in this clonally propagated crop. Further, potentially deleterious alleles such as these  
363 large haplotypic SVs, as well as SNPs previously characterized (Ramu *et al.*, 2017), warrant further  
364 research as these may contribute to limits in inbreeding of cassava.

### 365 **Tissue specific gene expression Cassava Atlas**

366 We previously published gene expression patterns for 11 different cassava tissue types based on  
367 the AM560-2 reference genome (Wilson *et al.*, 2017). With our newly assembled phased genome, we  
368 updated this existing resource. All 11 RNA-seq datasets were mapped to the Phase0 scaffolded and  
369 annotated TME7 assembly, and differentially expressed genes were identified as previously described.  
370 These results can be further explored at: [shiny.danforthcenter.org/cassava\\_atlas](http://shiny.danforthcenter.org/cassava_atlas).

### 371 **Summary**

372 While recently released assemblies of farmer-preferred cassava lines contain information from  
373 both haplotypes in the assembly, the limitation of these assemblies is in the lack of haplotypic purging  
374 and sequence deduplication (Kuon *et al.*, 2019). Thus, these assemblies do not fully represent either of the

375 haplotypes. Our assembly was successfully deduplicated of most haplotypic sequences, as evidenced by  
376 k-mer, BUSCO, and linkage map-based analyses. We further successfully used Hi-C sequencing data to  
377 phase and create pseudo-haplotype assemblies. The phased assembly described herein, is thus currently  
378 the most accurate assembly of a cassava genotype representative of those grown by millions of  
379 subsistence farmers around the world. The differences in genome size compared to the published  
380 reference (~700Mb vs the estimated ~750Mb for AM560-2), alongside the large SVs identified between  
381 the genotypes, showcases how diversity in cassava goes beyond small nucleotide level variation between  
382 accessions. We further show that not only does TME7 have large structural variation compared to  
383 AM560-2, but that within the genome there are thousands of haplotypic structural variants, potentially  
384 perpetuated through clonal variation. Many of these SVs are in close proximity to annotated genes and  
385 allelic specific expression of these genes was observed. Further research will help inform how these  
386 variants interact and affect gene hemizyosity, copy number, and expression as well as the impact  
387 agronomically important traits. We believe this assembly will be an invaluable resource to the cassava  
388 research and breeding community, and will further aid in developing tools to ensure food security to those  
389 who rely on cassava.

#### 390 **Data Availability**

391 Both haplotype genome assemblies are stored under NCBI accession number #####. Short and  
392 long reads in assembly have been uploaded under the SRA accession #####. Custom scripts used for  
393 assembly and analysis are available in Supplementary Files 5 and 6.

#### 394 **Funding**

395 This work was funded by the Donald Danforth Plant Science Center and the Bill and Melinda  
396 Gates Foundation (OPP1093529, OPP1194889 and INV-002958).

#### 397 **Acknowledgements**

398 We thank Nigel Taylor, Getu Deguma, Narayanan Narayanan, Wilhelm Gruissem, and Yi-Wen  
399 Lim for contributing the TME7 tissue samples and Illumina reads and for helpful discussions throughout  
400 this research. We thank Alex Harkess for advice on the assembly strategies. We thank Kerrigan Gilbert  
401 for discussion and for the critical reading of the manuscript.



## 402 **Methods**

### 403 **Plant material and nucleic acid extraction**

404 Cassava line TME7 (Oko-iyawo) were obtained from Peter Kulakow at IITA in Ibadan, Nigeria. Plantlets  
405 were maintained in tissue culture by Nigel Taylor's lab at the Donald Danforth Plant Science Center.  
406 Fresh young leaves were collected for extraction of high molecular weight DNA using a CTAB extraction  
407 method (Clarke, 2009).

### 408 **Library preparation and sequencing**

409 Illumina:

410 Data from Illumina short sequencing DNA libraries of TME7 were provided by Wilhelm Gruissem's lab  
411 at ETH Zurich. After adapter trimming by the sequencing facility, reads were *de novo* de-duped using  
412 Nubeam-dedup (Dai and Guan, 2020) prior to further use.

413 PacBio:

414 Initial PacBio sequencing was contributed by Todd Michael in 2016 and did not include size selection  
415 prior to sequencing. The PacBio libraries were sequenced on a PacBio RSII system with P6C4 chemistry.  
416 A second set of PacBio libraries were constructed using the manufacturer's protocol and were size  
417 selected for 20 kb fragments on the BluePippen system (Sage Science) followed by subsequent  
418 purification using AMPure XP beads (Beckman Coulter). Sequencing was performed by the University of  
419 Delaware DNA Sequencing & Genotyping Center.

420 Chromatin Conformation Capture sequencing (Hi-C):

421 Fresh, young cassava leaf material was sent to Dovetail Genomics (Scotts Valley, CA) for DNA  
422 extraction, digestion with DpnII, library preparation, and sequencing.

### 423 **Genome size and heterozygosity estimation**

424 Flow cytometry protocol was performed at the Benaroya Research Institute at Virginia Mason in Seattle,  
425 Washington following their standard methods.

426

427 Genome size and heterozygosity were also estimated by means of k-mer counting. We used Jellyfish  
428 (Marçais and Kingsford, 2011) to count k-mers of size 21 and plot their depth distributions from the  
429 ~100x Paired-End adapter-trimmed and deduped Illumina sequencing reads of TME7. The maximum k-  
430 mer depth was set to 1e6, which allows inclusion of repetitive regions of the genome. We then used the  
431 GenomeScope v1 web application (Vurture *et al.*, 2017) to model the genome size and heterozygosity for  
432 each one of these histograms, and used the model fit to select the best k-mer size for analysis.

### 433 **De novo genome assembly and scaffolding**

#### 434 *Maximizing the diploid assembly*

435 We first assembled the PacBio reads *de novo* using the FALCON and FALCON-Unzip (Chin *et al.*, 2016)  
436 suite of tools (v1.5.2) which included one round of consensus polishing with quiver. The config files for  
437 all FALCON tools are supplied as Supplementary File 4. We further polished only INDELS with 1 round  
438 of Pilon (Walker *et al.*, 2014). We identified missing heterozygous sequences using Merqury count  
439 spectra plots (Rhie *et al.*, 2020). The k-mers unique to the short-reads and missing from the assembly  
440 were then extracted using Meryl tool set (Rhie *et al.*, 2020; Miller *et al.*, 2008) and finally extracted the  
441 reads containing those k-mers using the function meryl lookup. The short-reads were first down sampled  
442 and normalized to ~100x coverage using BBnorm from the BBTools suite  
443 (<https://sourceforge.net/projects/bbmap/>) then assembled using SPAdes (Bankevich *et al.*, 2012) and the  
444 resulting contigs were filtered for a minimum coverage depth of 10x and length of 500 bp.

#### 445 *Assembly deduplication*

446 The complete set of assembled sequences was concatenated and processed through the purge\_dups (Guan  
447 *et al.*, 2020) pipeline. Alignment coverage histograms inform assembly purging software, such as  
448 purge\_dups or purge\_haplotigs (Roach *et al.*, 2018), as to what sequences are potential haplotigs or  
449 duplication. While these software packages were developed for use with long reads, we found that short-  
450 reads allow for higher resolution when plotting coverage histograms, which in turn results in more  
451 accurate sequence purging. Thus we aligned ~100x deduped PE short-reads to the entire diploid assembly  
452 for purging. First, duplicates, caused by retained haplotigs, haplotypic overlaps, and junk contigs, were  
453 purged from the primary assembly using manual depth cutoff settings of 5, 76, 126, 151, 252,  
454 453. A second round of purging on the “haplotig” output of purge\_dups was useful to remove duplicates  
455 and artifact contigs created by purge\_dups during purging of overlaps, again using automatic depth  
456 cutoffs (5, 70, 136, 137, 219, 534). We then renamed all contigs and haplotigs in the

457 FALCON-Unzip naming convention for further processing using scripts in R and python (Supplementary  
458 File 5). Briefly, haplotigs which had associated primary contigs in the `dups.bed` file were renamed to  
459 match their respective primary contigs. Those that did not have matches (i.e. contigs with low coverage in  
460 round 1 of purging etc.) were aligned to the primary assembly using `nucmer` (Delcher *et al.*, 2018) and  
461 BLAST. The primary contig with the longest set of alignments was selected as the associated primary  
462 contig.

### 463 *Haplotype phasing*

464 The resulting pseudo-haplotype primary contigs and haplotigs alongside the Hi-C data were passed to  
465 FALCON-Phase for phase switch correction, creating one complete set of contigs for each phase  
466 (Kronenberg *et al.*, 2018). However, due to the large number of structural variants between the TME7  
467 haplotypes, we modified the `coords2hp.py` script in FALCON-Phase to always include the entire length of  
468 the haplotig in placement (Supplementary File 5). This reduced the length of haplotig sequence discarded  
469 by FALCON-Phase during phasing. We output the results in both “pseudohap” and “unzip” formats.

### 470 *Scaffolding*

471 The Proximo Hi-C genome scaffolding platform from Phase Genomics (Seattle, WA) was used to create  
472 chromosome-scale scaffolds from the FALCON-Phase phase0 assembly, following the same single-phase  
473 scaffolding procedure described in Bickhart *et al.* (2017). As in the LACHESIS method (Burton *et al.*,  
474 2013), this process computes a contact frequency matrix from the aligned Hi-C read pairs, normalized by  
475 the number of `Sau3AI` restriction sites (GATC) on each contig, and constructs scaffolds in such a way as  
476 to optimize expected contact frequency and other statistical patterns in Hi-C data. Juicebox (Rao *et al.*,  
477 2014; Durand *et al.*, 2016) was then used to correct scaffolding errors. The Hi-C contact map was created  
478 by separately aligning the Hi-C read pairs to the scaffolded genome then generating a Hi-C contact matrix  
479 using the command line version of HiCExplorer (Wolff *et al.*, 2020). A 10 kb matrix was first created,  
480 then bins were merged to get a 500 kb resolution for ease of plotting. Bin interaction data was then  
481 exported to table separated format (tsv) then imported to R for plotting.

## 482 **Assembly quality assessment**

### 483 *Linkage map alignment*

484 To further confirm the order and contiguity of the assembly we aligned the 22k marker composite linkage  
485 map (ICGMC, 2015) from cassava base (cassavabase.org). In this map, each SNP marker is aligned to the

486 cassava v4.1 draft genome assembly and a scaffold and physical position is reported alongside the genetic  
487 position. Using the *marker\_seqs.py* python script (Supplementary File 5) we extracted sequence from 100  
488 nt on both sides of each SNP in the v4.1 assembly. If the SNP marker was closer than 100 nt from the end  
489 of a scaffold, then the sequence with the maximum length possible around that SNP was extracted. These  
490 ~200 nt sequence tags were then aligned via BLAST to each phase of the current assembly. The numbers  
491 of uniquely mapping markers with alignment length >150 nt and >95% identity were used to assess levels  
492 of sequence duplication.

#### 493 *K-mer based evaluation*

494 Merqury (Rhie *et al.*, 2020) and the built-in Meryl implementation were used to enumerate the k-mer  
495 distribution in the Illumina PE reads and compare it to the diploid and haploid assemblies. Using the  
496 provided script in Merqury, a k-mer of 21 was selected to best represent a genome size of ~700 Mb. Copy  
497 number spectra and assembly spectra were plotted using the hist files provided and ggplot2. When k-mer  
498 distributions were used to estimate genome sequence length (i.e. to measure missing sequence space), the  
499 sum of counts of k-mers under the respective distribution was divided by the mean k-mer multiplicity of  
500 the distribution:  $(\text{sum}(kmer\ count * kmer\ multiplicity)) / \text{mean}(kmer\ multiplicity)$

#### 501 **Haplotype-specific annotation**

##### 502 *Transposable element annotation and repeat masking*

503 Transposable elements (TEs) of each assembly were independently annotated using EDTA v1.9.7 (Ou *et*  
504 *al.*, 2019) with parameters '`--sensitive 1 --anno 1 -t 18`' and '`--cds`' providing the  
505 coding sequences of the *M. esculenta* v6.1 assembly. Library sequences from the *de novo* TE library  
506 generated by EDTA were filtered and those present more than three full-length copies in the respective  
507 haploid assembly were retained. The remaining sequences from the two TE libraries were combined using  
508 the '*make\_panTElib.pl*' script in the EDTA package, generating a high-quality TE library. The final TE  
509 library was then used to annotate the two haploid genomes using RepeatMasker v4.1.1  
510 ([www.repeatmasker.org](http://www.repeatmasker.org)) with parameters '`-q -no_is -norna -nolow -div 40 -cutoff`  
511 `225`' that allow for up to 40% of sequence divergence. This step helped to annotate fragmented TEs. To  
512 consistently annotate intact TEs in the two haploid genomes, the final TE library and the final homology-  
513 based TE annotation were provided to EDTA with parameters '`--evaluate 1 --anno 1 -t 18`  
514 `--step final`'. In depth commands for TE annotation and LAI calculation are supplied in  
515 Supplementary File 5.

516

517 *Gene annotation*

518 Transcriptome data of 11 tissue types (Wilson *et al.*, 2017) was used to generate transcript evidence for  
519 annotation. Reads were trimmed with Trimmomatic (Bolger *et al.*, 2014) and aligned to the soft masked  
520 diploid reference (Phase0 scaffolds + Phase1 pseudohaplotype contigs concatenated) using Hisat2 v2.1.0  
521 (Kim *et al.*, 2019). Stringtie v1.3.5 was used to assemble transcripts from each alignment file and all files  
522 were merged with ‘stringtie merge’ (Pertea *et al.*, 2015). A fasta containing CDS for all transcripts was  
523 produced using gffread tool from the cufflinks (Trapnell *et al.*, 2010) package. These transcripts, together  
524 with AM560-2 v6.1 CDS sequences and protein sequence from Araport11 (Cheng *et al.*, 2017), were used  
525 for a first round of MAKER v2.31.8 (Cantarel *et al.*, 2008) gene annotation. Gene prediction was further  
526 performed by training SNAP (library 2013-02-16) (Korf, 2004) and AUGUSTUS v3.3 (Stanke and  
527 Morgenstern, 2005) as suggested in (Bowman *et al.*, 2017) and the output of the first round of MAKER  
528 annotation. After gene prediction the genes in the gff file were renamed and the file was split to produce  
529 one gff for each phase.

530 *Gene synteny analysis*

531 Comparison of gene synteny between the TME7 phase0 assembly and the AM560-2 ref6 assembly was  
532 performed with the Python MCScanX pipeline v1.1.12 (Tang *et al.*, 2008; Wang *et al.*, 2012). Briefly,  
533 annotation gff files were converted to bed format keeping one isoform per gene using  
534 `jcvi.formats.gff --primary_only`. A pairwise synteny search was performed and the high  
535 quality synteny block (anchors) were used in syntenic depth comparisons and plotting of karyotypes and  
536 dot plots.

537 *Assessment of genic and repetitive sequence space*

538 The completeness and duplication of the genic regions in the assembly was performed by using BUSCO  
539 v4.1.2 (Simão *et al.*, 2015) benchmark software (<http://busco.ezlab.org/>) and the “eudicotyledons\_odb10”  
540 ortholog dataset with default settings.

541 To evaluate the contiguity of the repetitive sequence assembly, the LTR Assembly Index (LAI) was  
542 evaluated using LAI beta3.2 (Ou *et al.*, 2018) with input files generated by EDTA. The initial LAI  
543 estimation was done using the ‘-q’ parameter, then average LTR identity and total LTR content were

544 obtained and further provided to the standardization of LAI, with parameters ‘-iden 95.63 -  
545 totLTR 53’. Regional LAI was calculated in 3 Mb windows with 300 kb overlapping steps.

## 546 **Structural variation and polymorphisms**

547 Structural variants between TME7 and the AM560-2 reference genome were identified by aligning the  
548 phase0 contigs vs the reference genome. The authors of the Assemblytics (Nattestad and Schatz, 2016)  
549 software recommend analysis using contigs and not scaffolds, to minimize bias from different gap sizes in  
550 the assembly. Thus, initially the reference assembly was split at gaps of greater than ten Ns using the  
551 python script *split\_scaffolds.py* (Supplementary File 5). After alignment with nucmer (Delcher *et al.*,  
552 2018) with settings: `--maxmatch -l 100 -c 500` the delta file was gzipped and uploaded to the  
553 Assemblytics web interface ([www.assemblytics.com](http://www.assemblytics.com)) for analysis. The results were exported as a bed file  
554 and imported into R for plotting. Dot plots of the alignments were produced using scripts modified from  
555 <https://jmonlong.github.io/Hippocampus/2017/09/19/mummerplots-with-ggplot2/> (Supplementary File  
556 6).

557 The locations of the five largest deletions identified were then examined for evidence of structural  
558 variation using short read mapping. Deduplicated Illumina reads from TME7 were aligned to the AM560-  
559 2 v6.1 reference using `bwa mem` (Li and Durbin, 2009). The sorted bam file was then loaded into `samplot`  
560 (Belyeu *et al.*, 2021) to plot the read coverage and identification of discordant mapping. SNPs and  
561 INDELS were identified by using `dnadiff` and `show-snps` programs in the MUMmer4 package (Delcher *et*  
562 *al.*, 2018).

563 Structural variation between the phases was then assessed by aligning phase1 unzip contigs vs. phase0  
564 scaffolds (split at >10 Ns) and using Assemblytics as above. Haplotype divergence was calculated by  
565 aligning the FALCON-Phase “Unzip”-emit-style haplotigs to the primary, Phase0, assembly using  
566 nucmer with these settings: `--maxmatch -l 100 -c 500`. Alignments were filtered with delta-  
567 filter -g and coordinates were output using `show-coords`. Finally, divergence from the primary assembly  
568 was calculated using scripts from [https://github.com/skingan/FC\\_Unzip\\_HaplotypeDivergence](https://github.com/skingan/FC_Unzip_HaplotypeDivergence). SNPs and  
569 INDELS between the phases were identified as above. Distances of genes to structural variants were  
570 measured using bedtools `closest` command (Quinlan and Hall, 2010).

## 571 **Allele specific expression**

572 We aligned leaf RNA-seq data from Wilson *et al.* (2017), to the TME7 phase0 assembly using STAR  
573 v2.7.8 (Dobin *et al.*, 2013). Alignments were then deduplicated with Picard tools and SNPs were called

574 using GATK v4.1.4.1 (Van der Auwera *et al.*, 2013). After minimal quality filtering (QD < 2.0, FS  
575 > 60.0, MQ < 40.0, MQRankSum < -12.5, ReadPosRankSum < -8.0), the SNP VCF  
576 file was then imported to phASER (Castel *et al.*, 2016) to accurately phase the variants within each gene  
577 model. PhASER settings were `--paired_end 1 --mapq 255 --baseq 10`. Haplotypic read  
578 counts per gene were then exported using the ‘phASER Gene AE’ tool and read into R for statistical  
579 analysis. For each gene, the REF and ALT read counts were compared using a binomial test and p-values  
580 were Bonferroni corrected. Genes with a false discovery rate of less than 0.05 were considered as  
581 showing ASE. We further categorized ASE genes as having “Complete ASE” or “Partial ASE” if allele  
582 ratios were greater or less than 0.9 towards one allele respectively. Distances to nearest INDEL were  
583 measured using bedtools *closest* command (Quinlan and Hall, 2010) and the distributions of distances of  
584 genes in different ASE categories were compared using the Kolmogorov–Smirnov test.

### 585 **SHINY app update**

586 Reads from the RNA-seq dataset for 11 tissue types were aligned to the TME7 Phase0 assembly using  
587 HISAT2 (Kim *et al.*, 2019) and abundance was quantified with Stringtie (Pertea *et al.*, 2015). Read counts  
588 were transformed into robust-FPKMs using DESeq2 (Love *et al.*, 2014). Finally, the annotation was  
589 matched to the transcript IDs and formatted to be read within the Shiny framework.

### 590 **Scripts and figures**

591 All scripts described above are supplied in Supplementary File 5. All R scripts for producing figures and  
592 summary results are supplied in Supplementary File 6.

593



594 **References**

- 595 **Alonge, M., Wang, X., Benoit, M., et al.** (2020) Major impacts of widespread structural  
596 variation on gene expression and crop improvement in tomato. *Cell*, **182**, 145-161.e23.  
597 Available at:  
598 <https://doi.org/10.1016/j.cell.2020.05.021><https://doi.org/10.1016/j.cell.2020.05.021>.
- 599 **Auwera, G.A. Van der, Carneiro, M.O., Hartl, C., et al.** (2013) *From fastQ data to high-*  
600 *confidence variant calls: The genome analysis toolkit best practices pipeline,*.
- 601 **Aye, T.M.** (2011) Cassava agronomy: Land preparation, time and method of planting and  
602 harvest, plant spacing and weed control. *Cassava Handb.*, 588–612.
- 603 **Bankevich, A., Nurk, S., Antipov, D., et al.** (2012) SPAdes: A new genome assembly  
604 algorithm and its applications to single-cell sequencing. *J. Comput. Biol.*, **19**, 455–477.
- 605 **Belyeu, J.R., Chowdhury, M., Brown, J., Pedersen, B.S., Michael, J., Cormier, M.J.,**  
606 **Quinlan, A.R. and Layer, R.M.** (2021) Samplot: a platform for structural variant visual  
607 validation and automated filtering. *Genome Biol.*, **22**, 161. Available at:  
608 <https://doi.org/10.1101/2020.09.23.310110>.
- 609 **Bickhart, D.M., Rosen, B.D., Koren, S., et al.** (2017) Single-molecule sequencing and  
610 chromatin conformation capture enable de novo reference assembly of the domestic goat  
611 genome. *Nat. Publ. Gr.*, **49**.
- 612 **Bolger, A.M., Lohse, M. and Usadel, B.** (2014) Trimmomatic: A flexible trimmer for Illumina  
613 sequence data. *Bioinformatics*, **30**, 2114–2120.
- 614 **Bowman, M.J., Pulman, J.A., Liu, T.L. and Childs, K.L.** (2017) A modified GC-specific  
615 MAKER gene annotation method reveals improved and novel gene predictions of high and  
616 low GC content in *Oryza sativa*. *BMC Bioinformatics*, **18**, 1–15.
- 617 **Bredeson, J. V., Lyons, J.B., Prochnik, S.E., et al.** (2016) Sequencing wild and cultivated  
618 cassava and related species reveals extensive interspecific hybridization and genetic  
619 diversity. *Nat. Biotechnol.*, **34**, 562–570. Available at:  
620 <http://www.nature.com/articles/nbt.3535>.
- 621 **Burton, J.N., Adey, A., Patwardhan, R.P., Qiu, R., Kitzman, J.O. and Shendure, J.** (2013)

- 622 Chromosome-scale scaffolding of de novo genome assemblies based on chromatin  
623 interactions.
- 624 **Campoy, J.A., Sun, H., Goel, M., et al.** (2020) Chromosome-level and haplotype-resolved  
625 genome assembly enabled by high-throughput single-cell sequencing of gamete genomes.  
626 *bioRxiv*, 2020.04.24.060046.
- 627 **Cantarel, B.L., Korf, I., Robb, S.M.C., Parra, G., Ross, E., Moore, B., Holt, C., Sánchez  
628 Alvarado, A. and Yandell, M.** (2008) MAKER: an easy-to-use annotation pipeline  
629 designed for emerging model organism genomes. *Genome Res.*, **18**, 188–96. Available at:  
630 <http://genome.cshlp.org/content/18/1/188.short> [Accessed November 10, 2013].
- 631 **Castel, S.E., Levy-Moonshine, A., Mohammadi, P., Banks, E. and Lappalainen, T.** (2015)  
632 Tools and best practices for data processing in allelic expression analysis. *Genome Biol.*, **16**,  
633 1–12. Available at: <http://dx.doi.org/10.1186/s13059-015-0762-6>.
- 634 **Castel, S.E., Mohammadi, P., Chung, W.K., Shen, Y. and Lappalainen, T.** (2016) Rare  
635 variant phasing and haplotypic expression from RNA sequencing with phASER. *Nat.*  
636 *Commun.*, **7**, 8–13.
- 637 **Ceballos, H., Iglesias, C.A., Pérez, J.C. and Dixon, A.G.O.** (2004) Cassava breeding:  
638 Opportunities and challenges. *Plant Mol. Biol.*, **56**, 503–516.
- 639 **Cheng, C.Y., Krishnakumar, V., Chan, A.P., Thibaud-Nissen, F., Schobel, S. and Town,  
640 C.D.** (2017) Araport11: a complete reannotation of the *Arabidopsis thaliana* reference  
641 genome. *Plant J.*, **89**, 789–804.
- 642 **Chin, C.S., Peluso, P., Sedlazeck, F.J., et al.** (2016) Phased diploid genome assembly with  
643 single-molecule real-time sequencing. *Nat. Methods*, **13**, 1050–1054. Available at:  
644 <http://dx.doi.org/10.1038/nmeth.4035>.
- 645 **Clarke, J.D.** (2009) Cetyltrimethyl ammonium bromide (CTAB) DNA miniprep for plant DNA  
646 isolation. *Cold Spring Harb. Protoc.*, **4**, 5177–5179.
- 647 **Dai, H. and Guan, Y.** (2020) Nubeam-dedup: a fast and RAM-efficient tool to de-duplicate  
648 sequencing reads without mapping. *Bioinformatics*, 1–3.
- 649 **Delcher, A.L., Phillippy, A.M. and Coston, R.** (2018) MUMmer4: A fast and versatile  
650 genome alignment system. , 1–14.

- 651 **Dobin, A., Davis, C.A., Schlesinger, F., Drenkow, J., Zaleski, C., Jha, S., Batut, P.,**  
652 **Chaisson, M. and Gingeras, T.R.** (2013) STAR: Ultrafast universal RNA-seq aligner.  
653 *Bioinformatics*, **29**, 15–21.
- 654 **Durand, N.C., Robinson, J.T., Shamim, M.S., Machol, I., Mesirov, J.P., Lander, E.S. and**  
655 **Aiden, E.L.** (2016) Juicebox provides a visualization system for Hi-C contact maps with  
656 unlimited zoom. *Cell Syst.*, **3**, 99–101. Available at:  
657 <http://dx.doi.org/10.1016/j.cels.2015.07.012>.
- 658 **Guan, D., McCarthy, S.A., Wood, J., Howe, K., Wang, Y. and Durbin, R.** (2020) Identifying  
659 and removing haplotypic duplication in primary genome assemblies A. Valencia, ed.  
660 *Bioinformatics*, **36**, 2896–2898. Available at:  
661 <https://academic.oup.com/bioinformatics/article/36/9/2896/5714742>.
- 662 **Huang, S., Kang, M. and Xu, A.** (2017) HaploMerger2: Rebuilding both haploid sub-  
663 assemblies from high-heterozygosity diploid genome assembly. *Bioinformatics*, **33**, 2577–  
664 2579.
- 665 **ICGMC** (2015) High-resolution linkage map and chromosome-scale genome assembly for  
666 cassava (*Manihot esculenta* crantz) from 10 populations. *G3 Genes, Genomes, Genet.*, **5**,  
667 133.
- 668 **Kim, D., Paggi, J.M., Park, C., Bennett, C. and Salzberg, S.L.** (2019) Graph-based genome  
669 alignment and genotyping with HISAT2 and HISAT-genotype. *Nat. Biotechnol.*, **37**, 907–  
670 915. Available at: <http://dx.doi.org/10.1038/s41587-019-0201-4>.
- 671 **Knowles, D.A., Davis, J.R., Edgington, H., et al.** (2017) Allele-specific expression reveals  
672 interactions between genetic variation and environment. *Nat. Methods*, **14**, 699–702.  
673 Available at: <http://dx.doi.org/10.1038/nmeth.4298>.
- 674 **Koren, S., Rhie, A., Walenz, B.P., et al.** (2018) De novo assembly of haplotype-resolved  
675 genomes with trio binning. *Nat. Biotechnol.*, **36**, 1174–1182. Available at:  
676 <http://www.nature.com/articles/nbt.4277> [Accessed November 16, 2019].
- 677 **Korf, I.** (2004) Gene finding in novel genomes. *BMC Bioinformatics*, **5**, 1–9.
- 678 **Kronenberg, Z.N., Rhie, A., Koren, S., et al.** (2018) Extended haplotype phasing of de novo  
679 genome assemblies with FALCON-Phase. *bioRxiv*, 1–27.

- 680 **Kuon, J.-E., Qi, W., Schläpfer, P., et al.** (2019) Haplotype-resolved genomes of geminivirus-  
681 resistant and geminivirus-susceptible African cassava cultivars. *BMC Biol.*, **17**, 75.  
682 Available at: <https://bmcbiol.biomedcentral.com/articles/10.1186/s12915-019-0697-6>.
- 683 **Li, H. and Durbin, R.** (2009) Fast and accurate short read alignment with Burrows-Wheeler  
684 transform. *Bioinformatics*, **25**, 1754–1760.
- 685 **Liu, J., Shi, Cong, Shi, C.-C., et al.** (2020) The chromosome-based rubber tree genome  
686 provides new insights into spurge genome evolution and rubber biosynthesis. *Mol. Plant*,  
687 **13**, 336–350. Available at:  
688 <https://linkinghub.elsevier.com/retrieve/pii/S1674205219304022>.
- 689 **Love, M.I., Huber, W. and Anders, S.** (2014) Moderated estimation of fold change and  
690 dispersion for RNA-seq data with DESeq2. *Genome Biol.*, **15**, 1–34.
- 691 **Lyons, J.B., Bredeson, J. V., Mansfeld, B.N., Bauchet, G.J., Berry, J., Boyher, A., Mueller,**  
692 **L.A., Rokhsar, D.S. and Bart, R.S.** (2021) Current status and impending progress for  
693 cassava structural genomics. *Plant Mol. Biol.* Available at: [https://doi.org/10.1007/s11103-](https://doi.org/10.1007/s11103-020-01104-w)  
694 [020-01104-w](https://doi.org/10.1007/s11103-020-01104-w).
- 695 **Marçais, G. and Kingsford, C.** (2011) A fast, lock-free approach for efficient parallel counting  
696 of occurrences of k-mers. *Bioinformatics*, **27**, 764–770.
- 697 **Michael, T.P. and VanBuren, R.** (2020) Building near-complete plant genomes. *Curr. Opin.*  
698 *Plant Biol.*, **54**, 26–33. Available at: <https://doi.org/10.1016/j.pbi.2019.12.009>.
- 699 **Miller, J.R., Delcher, A.L., Koren, S., et al.** (2008) Aggressive assembly of pyrosequencing  
700 reads with mates. *Bioinformatics*, **24**, 2818–2824.
- 701 **Minio, A., Massonnet, M., Figueroa-Balderas, R., Castro, A. and Cantu, D.** (2019) Diploid  
702 genome assembly of the wine grape Carménère. *G3 Genes/Genomes/Genetics*, **9**, 1331–  
703 1337. Available at: <http://g3journal.org/lookup/doi/10.1534/g3.119.400030>.
- 704 **Nattestad, M. and Schatz, M.C.** (2016) Assemblytics: A web analytics tool for the detection of  
705 variants from an assembly. *Bioinformatics*, **32**, 3021–3023.
- 706 **Ou, S., Chen, J. and Jiang, N.** (2018) Assessing genome assembly quality using the LTR  
707 Assembly Index (LAI). *Nucleic Acids Res.*, **46**, 1–11. Available at:  
708 <https://academic.oup.com/nar/advance-article/doi/10.1093/nar/gky730/5068908>.

- 709 **Ou, S., Su, W., Liao, Y., et al.** (2019) Benchmarking transposable element annotation methods  
710 for creation of a streamlined, comprehensive pipeline. *Genome Biol.*, **20**, 1–18.
- 711 **Padgitt-Cobb, L.K., Kingan, S.B., Wells, J., et al.** (2019) A phased, diploid assembly of the  
712 Cascade hop (*Humulus lupulus*) genome reveals patterns of selection and haplotype  
713 variation. *bioRxiv*, 786145. Available at:  
714 <http://biorxiv.org/content/early/2019/09/28/786145.abstract>.
- 715 **Patel, S., Lu, Z., Jin, X., Swaminathan, P., Zeng, E. and Fennell, A.Y.** (2018) Comparison of  
716 three assembly strategies for a heterozygous seedless grapevine genome assembly. , 1–12.
- 717 **Pertea, M., Pertea, G.M., Antonescu, C.M., Chang, T.C., Mendell, J.T. and Salzberg, S.L.**  
718 (2015) StringTie enables improved reconstruction of a transcriptome from RNA-seq reads.  
719 *Nat. Biotechnol.*, **33**, 290–295.
- 720 **Prochnik, S., Marri, P.R., Desany, B., et al.** (2012) The cassava genome: Current progress,  
721 future directions. *Trop. Plant Biol.*, **5**, 88–94. Available at:  
722 <http://link.springer.com/10.1007/s12042-011-9088-z>.
- 723 **Quinlan, A.R. and Hall, I.M.** (2010) BEDTools: a flexible suite of utilities for comparing  
724 genomic features. , **26**, 841–842.
- 725 **Rabbi, I., Hamblin, M., Gedil, M., Kulakow, P., Ferguson, M., Ikpan, A.S., Ly, D. and**  
726 **Jannink, J.L.** (2014) Genetic mapping using genotyping-by-sequencing in the clonally  
727 propagated cassava. *Crop Sci.*, **54**, 1384–1396.
- 728 **Ramu, P., Esuma, W., Kawuki, R., et al.** (2017) Cassava haplotype map highlights fixation of  
729 deleterious mutations during clonal propagation. *Nat. Publ. Gr.*, **49**, 959–963. Available at:  
730 <http://dx.doi.org/10.1038/ng.3845>.
- 731 **Rao, S.S.P., Huntley, M.H., Durand, N.C., et al.** (2014) A 3D map of the human genome at  
732 kilobase resolution reveals principles of chromatin looping. *Cell*, **159**, 1665–1680.  
733 Available at: <http://dx.doi.org/10.1016/j.cell.2014.11.021>.
- 734 **Rhie, A., Walenz, B.P., Koren, S. and Phillippy, A.M.** (2020) Merqury: reference-free quality,  
735 completeness, and phasing assessment for genome assemblies. *Genome Biol.*, **21**, 245.  
736 Available at: <http://biorxiv.org/content/early/2020/03/17/2020.03.15.992941.abstract>.
- 737 **Roach, M.J., Schmidt, S.A. and Borneman, A.R.** (2018) Purge Haplotigs: Allelic contig

- 738 reassignment for third-gen diploid genome assemblies. *BMC Bioinformatics*, **19**, 1–10.
- 739 **Rojas, M.C., Pérez, J.C., Ceballos, H., Baena, D., Morante, N. and Calle, F.** (2009) Analysis  
740 of inbreeding depression in eight S<sub>1</sub> cassava families.
- 741 **Shao, L., Xing, F., Xu, C., et al.** (2019) Patterns of genome-wide allele-specific expression in  
742 hybrid rice and the implications on the genetic basis of heterosis. *Proc. Natl. Acad. Sci. U.*  
743 *S. A.*, **116**, 5653–5658.
- 744 **Simão, F.A., Waterhouse, R.M., Ioannidis, P., Kriventseva, E. V and Zdobnov, E.M.** (2015)  
745 BUSCO: assessing genome assembly and annotation completeness with single-copy  
746 orthologs. *Bioinformatics*, **31**, 3210–3212.
- 747 **Stanke, M. and Morgenstern, B.** (2005) AUGUSTUS: A web server for gene prediction in  
748 eukaryotes that allows user-defined constraints. *Nucleic Acids Res.*, **33**, 465–467.
- 749 **Tang, H., Wang, X., Bowers, J.E., Ming, R., Alam, M. and Paterson, A.H.** (2008) Unraveling  
750 ancient hexaploidy through multiply-aligned angiosperm gene maps. *Genome Res.*, **18**,  
751 1944–1954.
- 752 **Trapnell, C., Williams, B.A., Pertea, G., Mortazavi, A., Kwan, G., Baren, M.J. van,**  
753 **Salzberg, S.L., Wold, B.J. and Pachter, L.** (2010) Transcript assembly and quantification  
754 by RNA-Seq reveals unannotated transcripts and isoform switching during cell  
755 differentiation. *Nat. Biotechnol.*, **28**, 511–5.
- 756 **Vurture, G.W., Sedlazeck, F.J., Nattestad, M., Underwood, C.J., Fang, H., Gurtowski, J.**  
757 **and Schatz, M.C.** (2017) GenomeScope: Fast reference-free genome profiling from short  
758 reads. *Bioinformatics*, **33**, 2202–2204.
- 759 **Walker, B.J., Abeel, T., Shea, T., et al.** (2014) Pilon: An integrated tool for comprehensive  
760 microbial variant detection and genome assembly improvement. *PLoS One*, **9**.
- 761 **Wang, Y., Tang, H., Debarry, J.D., et al.** (2012) MCScanX: A toolkit for detection and  
762 evolutionary analysis of gene synteny and collinearity. *Nucleic Acids Res.*, **40**, 1–14.
- 763 **Wilson, M.C., Mutka, A.M., Hummel, A.W., et al.** (2017) Gene expression atlas for the food  
764 security crop cassava. *New Phytol.*, **213**, 1632–1641. Available at:  
765 <https://onlinelibrary.wiley.com/doi/10.1111/nph.14443>.

- 766 **Wolff, J., Rabbani, L., Gilsbach, R., Richard, G., Manke, T., Backofen, R. and Grüning,**  
767 **B.A.** (2020) Galaxy HiCExplorer 3: A web server for reproducible Hi-C, capture Hi-C and  
768 single-cell Hi-C data analysis, quality control and visualization. *Nucleic Acids Res.*, **48**,  
769 W177–W184.
- 770 **Wood, D.L.A., Nones, K., Steptoe, A., et al.** (2015) Recommendations for accurate resolution  
771 of Gene and isoform allele-specific expression in RNA-seq data. *PLoS One*, **10**, 1–27.
- 772 **Zhang, X., Wu, R., Wang, Y., Yu, J. and Tang, H.** (2020) Unzipping haplotypes in diploid and  
773 polyploid genomes. *Comput. Struct. Biotechnol. J.*, **18**, 66–72. Available at:  
774 <https://doi.org/10.1016/j.csbj.2019.11.011>.
- 775 **Zhou, Y., Minio, A., Massonnet, M., Solares, E., Lv, Y., Beridze, T., Cantu, D. and Gaut,**  
776 **B.S.** (2019) The population genetics of structural variants in grapevine domestication. *Nat.*  
777 *Plants*, **5**, 965–979. Available at: <http://dx.doi.org/10.1038/s41477-019-0507-8>.
- 778



## **Figures: Large structural variations in the haplotype-resolved African cassava genome.**

<sup>1</sup>Ben N. Mansfeld: 0000-0001-6118-6409

<sup>1</sup>Adam Boyher: 0000-0001-9681-1817

<sup>1</sup>Jeffrey C. Berry: 0000-0002-8064-9787

<sup>1</sup>Mark Wilson:

<sup>2</sup>Shujun Ou: 0000-0001-5938-7180

<sup>1</sup>Seth Polydore: 0000-0002-7779-7367

<sup>3</sup>Todd P. Michael: 0000-0001-6272-2875

<sup>1</sup>Noah Fahlgren: 0000-0002-5597-4537

<sup>1,4</sup>Rebecca S. Bart: 0000-0003-1378-3481

<sup>1</sup> Donald Danforth Plant Science Center, St. Louis MO, USA 63132.

<sup>2</sup> Department of Ecology, Evolution, and Organismal Biology, Iowa State University, Ames, IA 50011

<sup>3</sup> The Molecular and Cellular Biology Laboratory, The Salk Institute for Biological Studies, La Jolla, CA 92037, USA

<sup>4</sup> Corresponding author: [rbart@danforthcenter.org](mailto:rbart@danforthcenter.org)

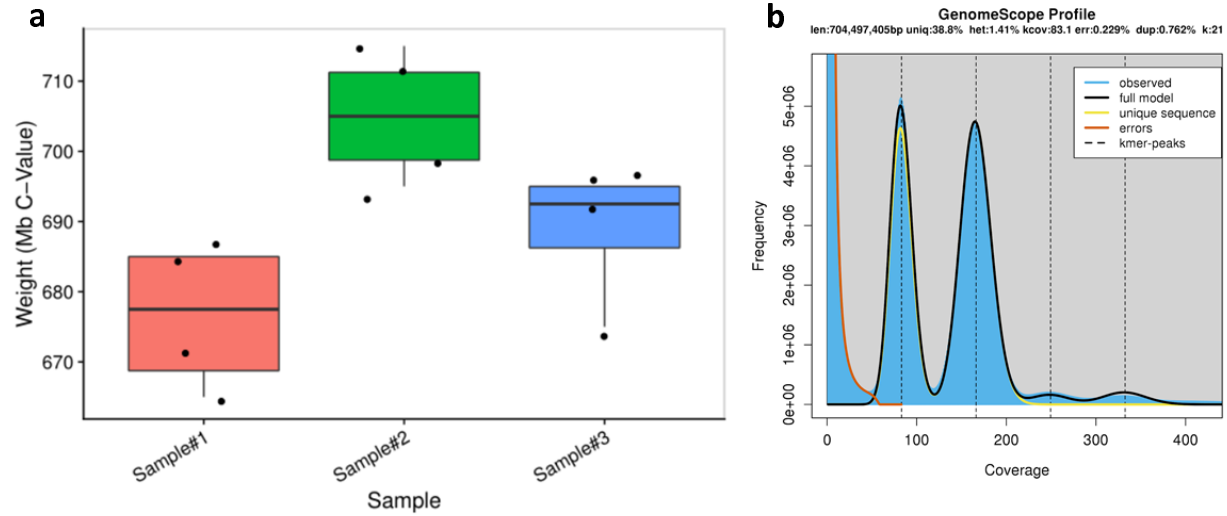

**Figure 1. Estimates of TME7 genome parameters using flow cytometry and short reads. (A)** Three biological samples of TME7, each with four technical replicates, were analyzed using flow cytometry. A mean genome size was estimated at 690 Mb. **(B)** Estimation of genome size, heterozygosity, and repetitiveness using GenomeScope Profile. K-mer size was set to 21, and k-mer coverage cutoff was set at 1e6 to include repeat regions in genome size estimates. The haploid genome size was estimated to be 704 Mb consisting of 61% repetitive sequence and a heterozygosity of 1.41%.

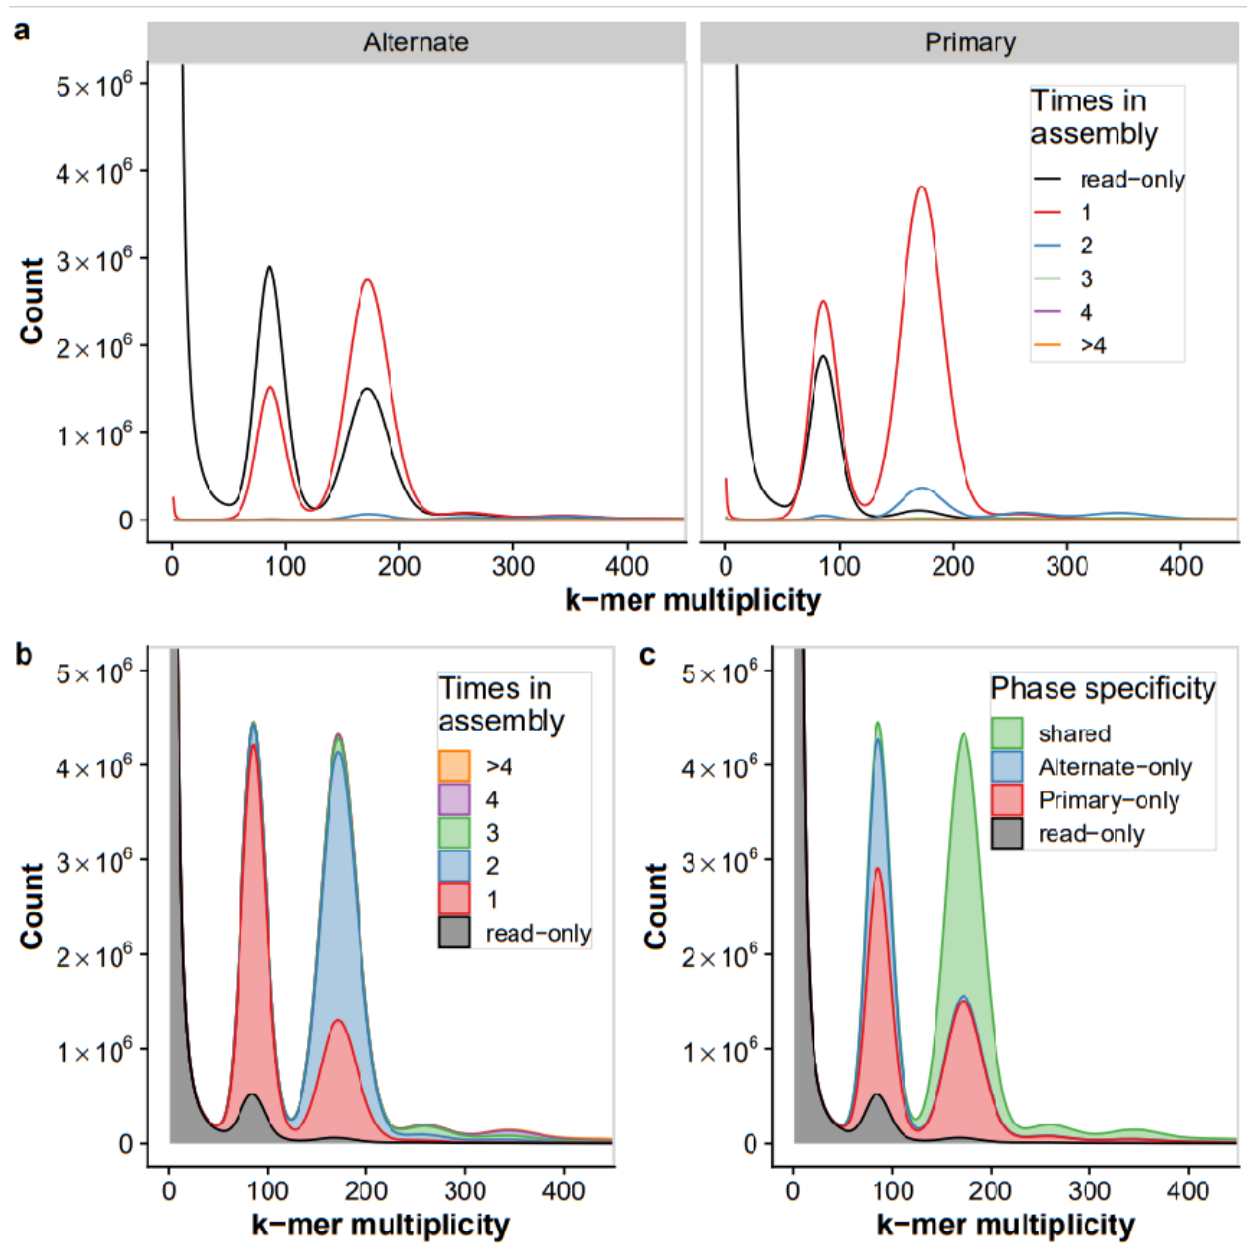

**Figure 2. K-mer copy number and assembly analyses for the final phased TME7 assemblies.** (A) K-mer count spectra for the alternate (haplotigs) and primary assemblies after phasing. (B) Diploid (primary + haplotigs) k-mer count spectra. In both (A) and (B), short read k-mer distribution plots are colored by the number of times a k-mer is present in the assembly. K-mers denoted in grey are missing from the assembly and represent probable short read sequencing errors ( $k$ -mer multiplicity  $< 50$ ) or missing assembled sequence ( $\geq 50$ ). (C) Assembly spectra of the diploid assembly suggest that most homozygous k-mers ( $\sim 200x$  peak) are shared between the assemblies, while most of the heterozygous ( $\sim 100x$  peak) k-mers are phase specific.

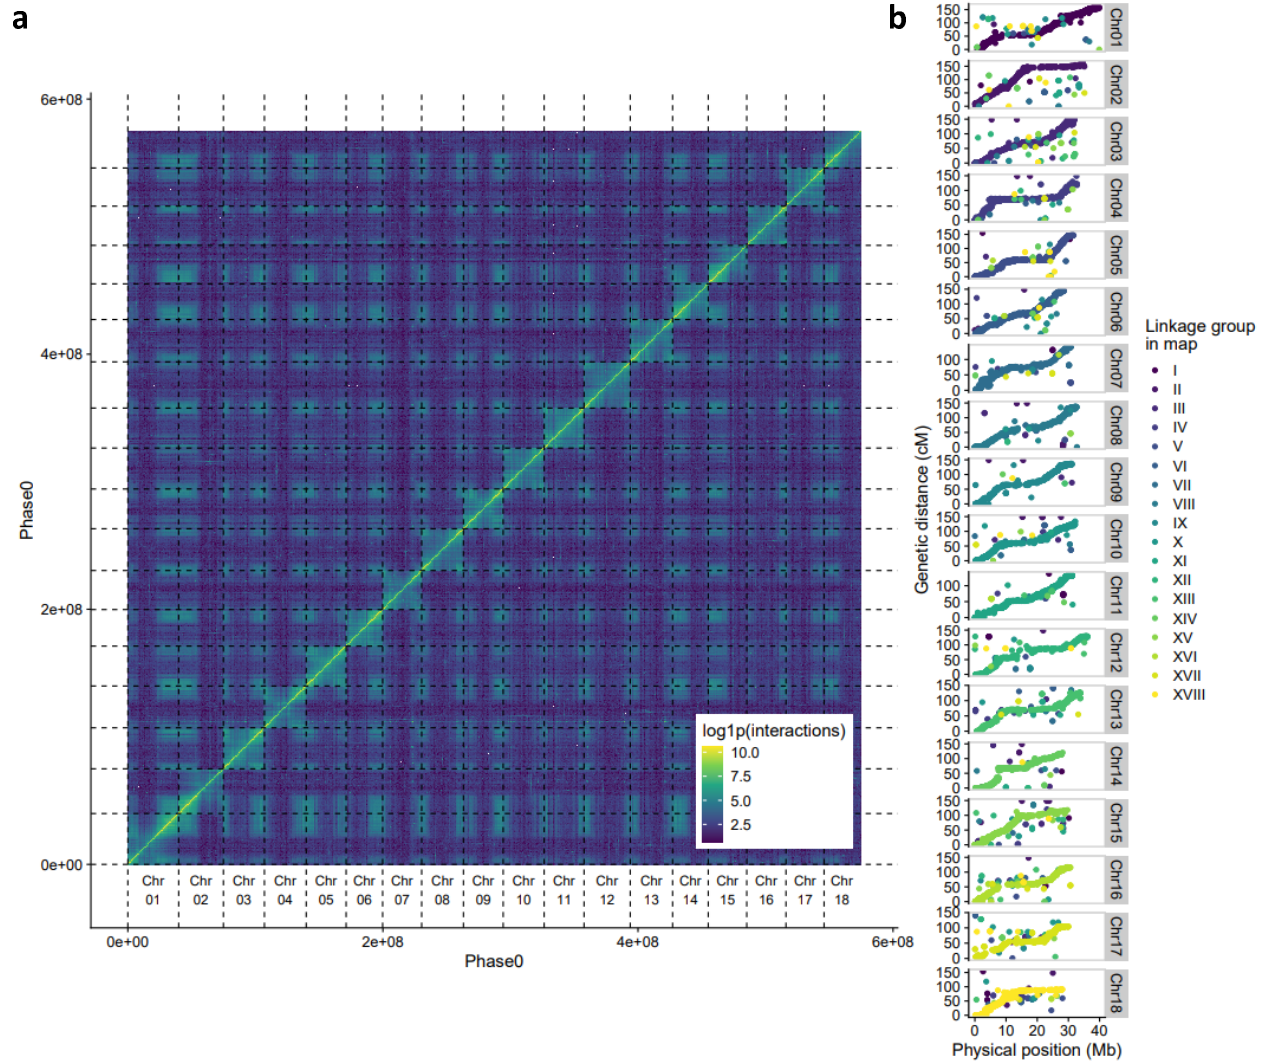

**Figure 3. Validation of Hi-C scaffolding order and orientation by contact map and linkage map alignment.** (A) Post-scaffolding Hi-C contact heatmap of the 18 largest scaffolds in the Phase0 assembly of TME7 showing the density of Hi-C interactions between regions of the genome. Color represents the intensity of interactions between regions, reported in  $\log(1 + x)$ . (B) Strong collinearity between the 22K marker Cassava Linkage Map and the TME7 Phase0 assembly. Markers are colored by their originating linkage group in the map.

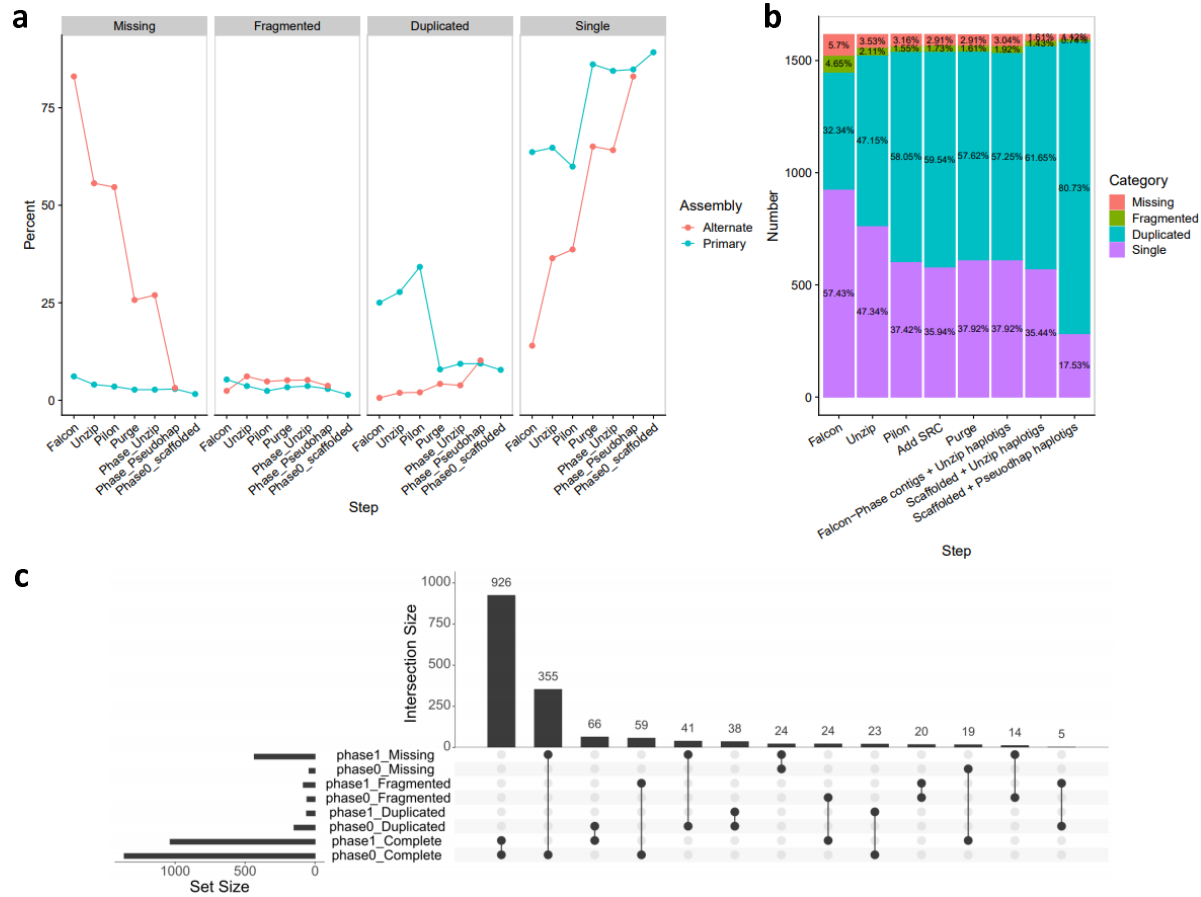

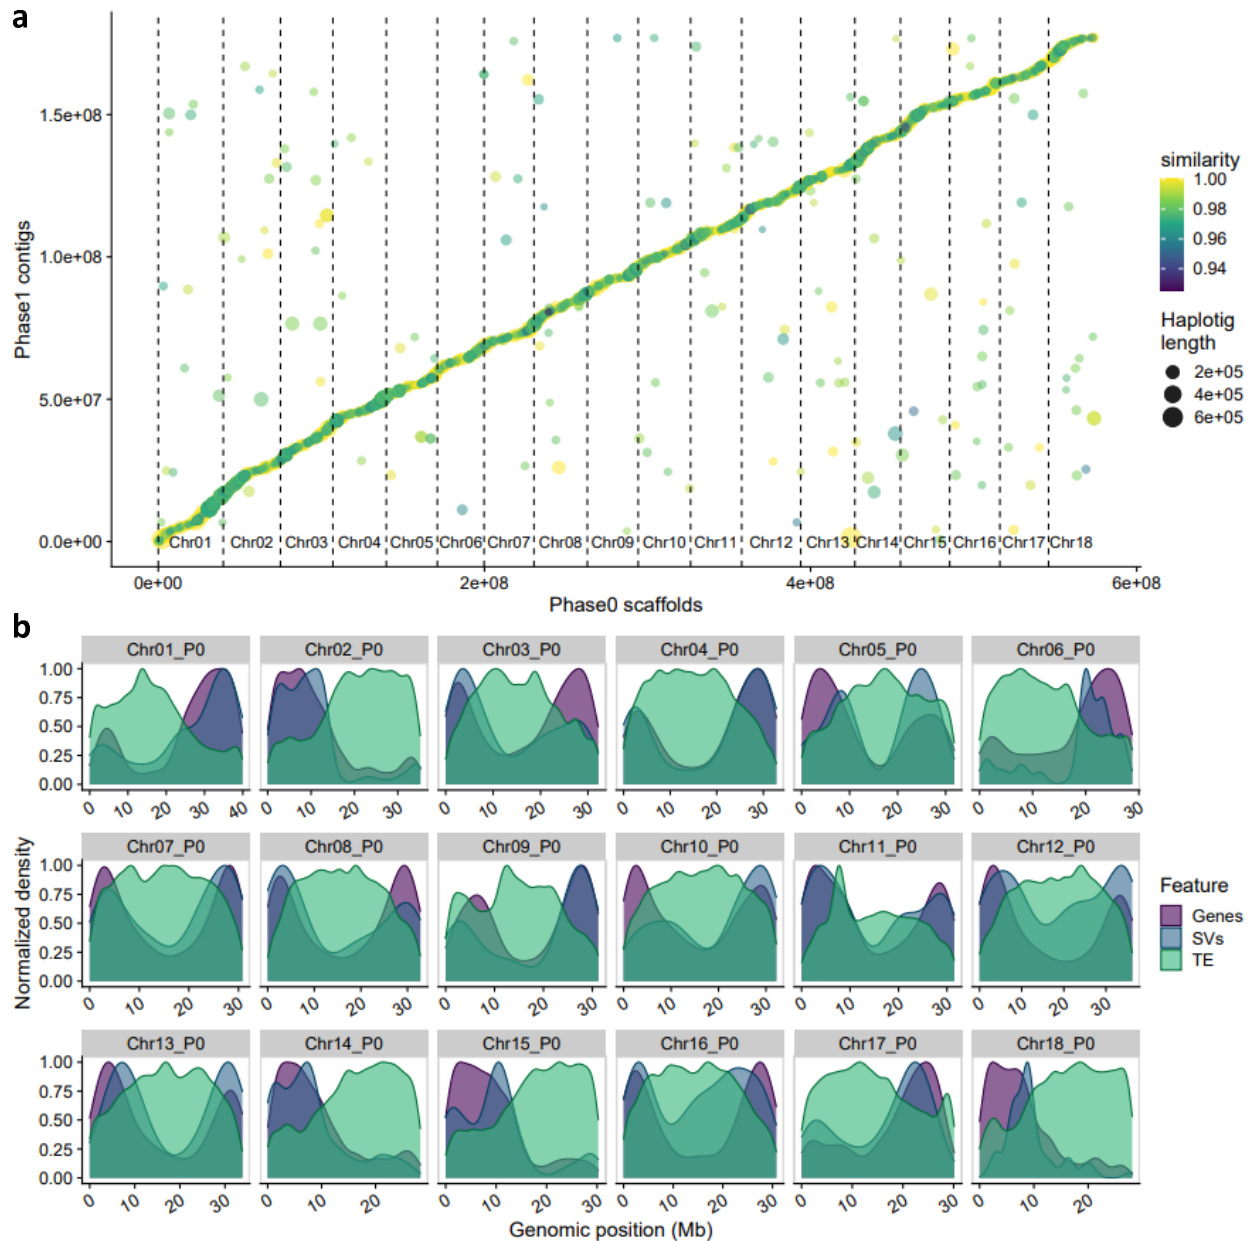

**Figure 5. Comparison of the TME7 haplotype phased assemblies. (A)** Dotplot of the best sequence alignments of the two haplotype assemblies. Color represents the alignment percent identity between the alternate assembly (Phase1) contig (haplotig) and the primary assembly (Phase0). **(B)** Chromosomal distribution of annotated genes, transposable elements (TE) and large haplotypic structural variants (SVs) between the two phased assemblies. Structural variants were identified by sequence alignment of the two phases. P0 = Phase0 assembly.

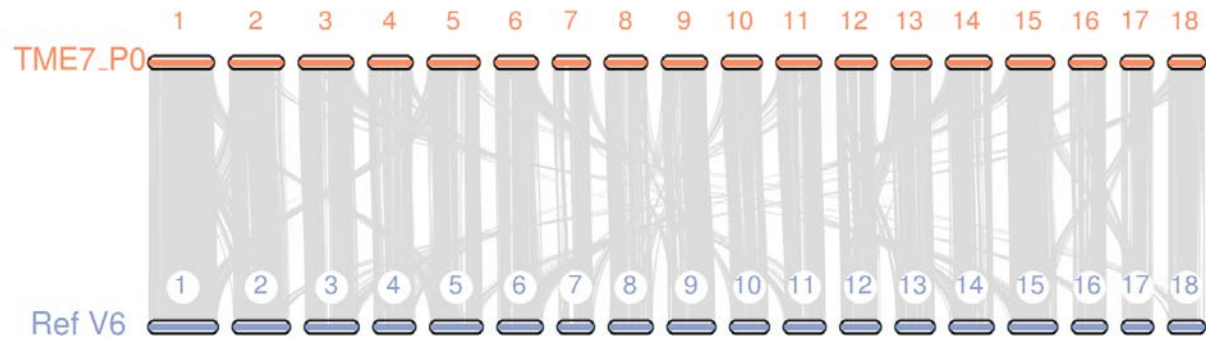

**Figure 6. Macro-synteny between of the TME7 and the AM560-2 Ref6.1 genome.** Gene synteny comparison between the scaffolded TME7-Phase0 assembly and the AM560-2 reference genome shows largely co-linear genomes with multiple inter-chromosomal duplications attributable to the paleotetraploidy described in cassava in Bredeson et al., (2016).



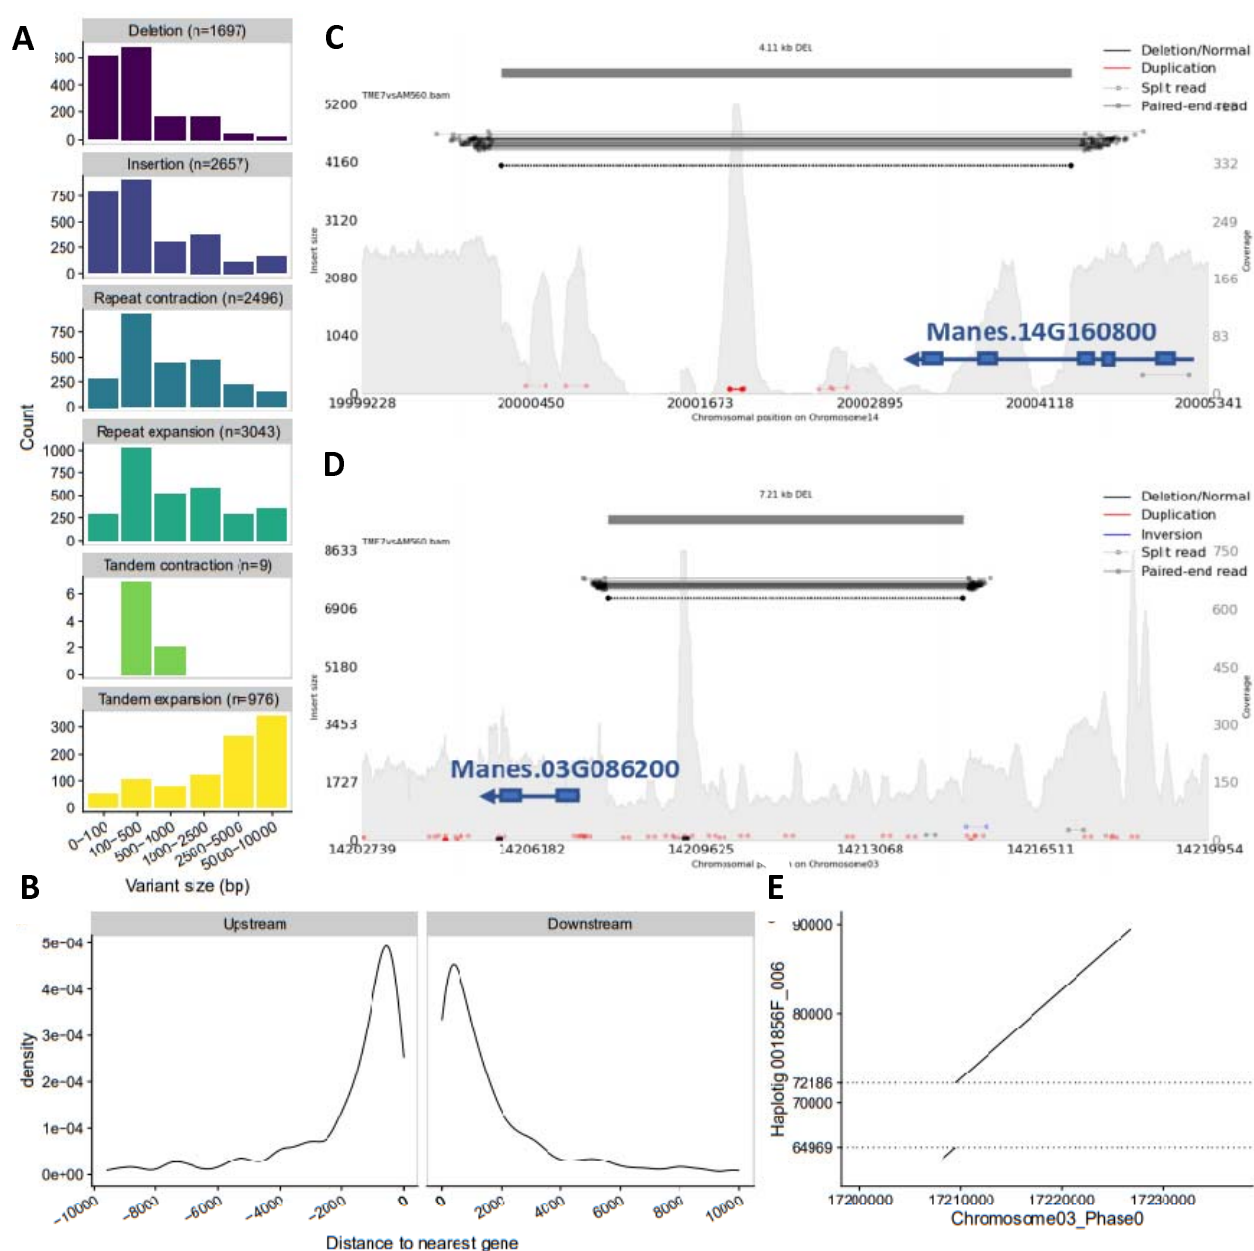

**Figure 7. Large structural variants identified in TME7 vs the AM560-2 reference genome.** (A) The size distribution histograms of structural variants identified by comparison of the phase0 assembly to the AM560-2 reference genome. (B) Density of distances (<10 kb away) of large deletions (50-10,000 bp) in TME7 from genes annotated in the AM560-2 reference. (C and D) Structural variants interrogated by paired-end reads. Reads with abnormally large insert sizes (color-coded horizontal bars, left y-axis) corroborate deletions identified by alignment of the assemblies. The depth of coverage (grey filled background, right y-axis) aid in determining the zygosity of the deletions. Gene models from the AM560-2 v6.1 annotation are in blue. (C) TME7 Phase0 assembly contains a homozygous 4.11 kb deletion compared to chromosome 14 of the AM560-2 Reference genome which overlaps the 3'-end of *Manes.14G160800*. (D) A 7.21 kb heterozygous deletion is verified on Chromosome 3, potentially overlapping with upstream regulatory region of *Manes.03G086200*. Other smaller sequence duplications are also observable (marked in red in C and D). The 7.21 kb heterozygous deletion in TME7 is correctly phased and assembled as an insertion in haplotig 001856F\_006. (E) The deletion between 64.9 kb and 72.1 kb on the haplotig, is delineated between the two dashed horizontal lines.

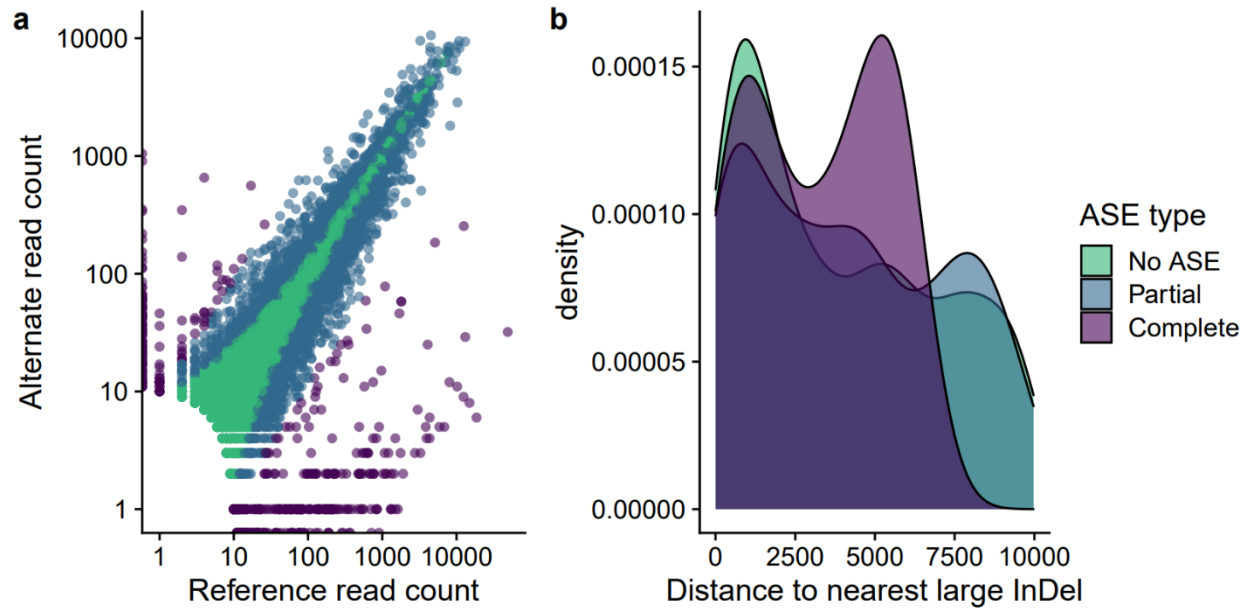

**Figure 8. Potential effects of large haplotypic structural variants on allele specific expression. (A)** Allele specific expression (ASE) patterns in cassava leaf RNA sequencing data. Each point represents an expressed gene and its respective read counts for either the reference or alternate alleles. If greater than 90% of read counts supported one allele of a gene over the other, the gene is characterized as having “Complete ASE” (Purple). Genes showing significant ASE but less than 90% allelic enrichment are categorized as “partial ASE” (Blue). If no significant ASE (FDR > 0.05) was observed genes are denoted in green. **(B)** The distribution of distances to the nearest upstream large insertion or deletion (InDel) for each category of gene.
